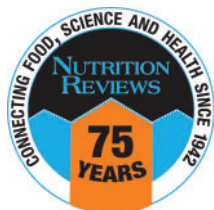

# Lifestyle recommendations for the prevention and management of metabolic syndrome: an international panel recommendation

Pablo Pérez-Martínez, Dimitri P. Mikhailidis, Vasilios G. Athyros, Mónica Bullo, Patrick Couture, María I. Covas, Lawrence de Koning, Javier Delgado-Lista, Andrés Díaz-López, Christian A. Drevon, Ramón Estruch, Katherine Esposito, Montserrat Fitó, Marta Garaulet, Dario Giugliano, Antonio García-Ríos, Niki Katsiki, Genovefa Kolovou, Benoît Lamarche, Maria Ida Maiorino, Guillermo Mena-Sánchez, Araceli Muñoz-Garach, Dragana Nikolic, José M. Ordovás, Francisco Pérez-Jiménez, Manfredi Rizzo, Jordi Salas-Salvadó, Helmut Schröder, Francisco J. Tinahones, Rafael de la Torre, Ben van Ommen, Suzan Wopereis, Emilio Ros\*, and José López-Miranda\*

*The importance of metabolic syndrome (MetS) lies in its associated risk of cardiovascular disease and type 2 diabetes, as well as other harmful conditions such as nonalcoholic fatty liver disease. In this report, the available scientific evidence on the associations between lifestyle changes and MetS and its components is reviewed to derive recommendations for MetS prevention and management. Weight loss through an energy-restricted diet together with increased energy expenditure*

**Affiliation:** P. Pérez-Martínez, J. Delgado-Lista, A. García-Ríos, F. Pérez-Jiménez, and J. López-Miranda are with the Lipid and Atherosclerosis Unit, IMIBIC/Reina Sofia University Hospital/University of Cordoba, Cordoba, Spain. P. Pérez-Martínez, M. Bullo, M.I. Covas, J. Delgado-Lista, A. Díaz-López, R. Estruch, M. Fitó, A. García-Ríos, G. Mena-Sánchez, A. Muñoz-Garach, F. Pérez-Jiménez, J. Salas-Salvadó, F.J. Tinahones, R. de la Torre, E. Ros, and J. López-Miranda are with the CIBER Fisiopatología Obesidad y Nutrición (CIBEROBN), Instituto de Salud Carlos III, Madrid, Spain. D.P. Mikhailidis is with the Department of Clinical Biochemistry, Royal Free Hospital Campus, University College London Medical School, University College London, London, United Kingdom. V.G. Athyros and N. Katsiki are with the Second Propedeutic Department of Internal Medicine, Medical School, Aristotle University of Thessaloniki, Hippokraton Hospital, Thessaloniki, Greece. M. Bullo, A. Díaz-López, G. Mena-Sánchez, and J. Salas-Salvadó are with the Human Nutrition Unit, Biochemistry Biotechnology Department, Faculty of Medicine and Health Sciences, Hospital Universitari de Sant Joan de Reus, IISPV, Universitat Rovira i Virgili, Reus, Spain. P. Couture and B. Lamarche are with the Institute on Nutrition and Functional Foods, Laval University, Quebec, Canada. M.I. Covas, M. Fitó, and H. Schröder are with the Cardiovascular Risk and Nutrition Research Group, Hospital del Mar Research Institute, Barcelona, Spain. M.I. Covas is with the NUPROAS (Nutritional Project Assessment) Handebolag, Nackä, Sweden. L. de Koning is with the the Department of Pathology and Department of Laboratory Medicine, Pediatrics, and Community Health Sciences, University of Calgary, Alberta, Canada. C.A. Drevon is with the Department of Nutrition, Institute of Basic Medical Sciences, Faculty of Medicine, University of Oslo, Oslo, Norway. R. Estruch is with the Department of Internal Medicine, Hospital Clínic, Institut d'Investigacions Biomèdiques August Pi i Sunyer, University of Barcelona, Barcelona, Spain. K. Esposito, D. Giugliano, and M. Ida Maiorino are with the Division of Endocrinology and Metabolic Diseases, Second University of Naples Diabetes Unit, Second University of Naples, Naples, Italy. M. Garaulet is with the Chronobiology Laboratory, Department of Physiology, University of Murcia and Research Biomedical Institute of Murcia, Murcia, Spain. G. Kolovou is with the 1st Cardiology Department, Onassis Cardiac Surgery Center, Athens, Greece. A. Muñoz-Garach and F.J. Tinahones are with the Servicio de Endocrinología y Nutrición, Hospital Clínico Virgen de la Victoria, Malaga, Spain. D. Nikolic and M. Rizzo are with the Biomedical Department of Internal Medicine and Medical Specialties, University of Palermo, Palermo, Italy. J.M. Ordovás is with the Jean Mayer US Department of Agriculture Human Nutrition Research Center on Aging, Tufts University School of Medicine, Boston, Massachusetts, United States. J.M. Ordovás is with the Department of Epidemiology, National Center of Cardiovascular Investigations, Madrid, Spain; and the Madrid Institute of Advanced Studies–Food, Madrid, Spain. H. Schröder is with the CIBER de Epidemiología y Salud Pública, Madrid, Spain. R. de la Torre is with the Human Pharmacology and Clinical Neurosciences Research Group, Hospital del Mar Research Institute, Barcelona, Spain. B. van Ommen and S. Wopereis are with the Toegepast Natuurwetenschappelijk Onderzoek, Zeist, The Netherlands. E. Ros is with the Lipid Clinic, Endocrinology and Nutrition Service, Institut d'Investigacions Biomèdiques August Pi i Sunyer, Hospital Clínic, Barcelona, Spain.

**Correspondence:** P. Perez-Martinez, Reina Sofia University Hospital, Lipids and Atherosclerosis Research Unit, Avda Menéndez Pidal, s/n 14004 Córdoba, Spain. Email: h02pemap@uco.es. Phone: +34-957736145.

\*These authors contributed equally to this work.

**Key words:** dietary pattern, lifestyle, metabolic syndrome, panel recommendation.

©The Author(s) 2017. Published by Oxford University Press on behalf of the International Life Sciences Institute. All rights reserved. For Permissions, please e-mail: journals.permissions@oup.com.

doi: 10.1093/nutrit/nux014

Nutrition Reviews® Vol. 75(5):307–326

307

*through physical activity contribute to the prevention and treatment of MetS. A Mediterranean-type diet, with or without energy restriction, is an effective treatment component. This dietary pattern should be built upon an increased intake of unsaturated fat, primarily from olive oil, and emphasize the consumption of legumes, cereals (whole grains), fruits, vegetables, nuts, fish, and low-fat dairy products, as well as moderate consumption of alcohol. Other dietary patterns (Dietary Approaches to Stop Hypertension, new Nordic, and vegetarian diets) have also been proposed as alternatives for preventing MetS. Quitting smoking and reducing intake of sugar-sweetened beverages and meat and meat products are mandatory. Nevertheless, there are inconsistencies and gaps in the evidence, and additional research is needed to define the most appropriate therapies for MetS. In conclusion, a healthy lifestyle is critical to prevent or delay the onset of MetS in susceptible individuals and to prevent cardiovascular disease and type 2 diabetes in those with existing MetS. The recommendations provided in this article should help patients and clinicians understand and implement the most effective approaches for lifestyle change to prevent MetS and improve cardiometabolic health.*

## INTRODUCTION

The metabolic syndrome (MetS) involves diagnostic characteristics that vary according to the definition used. In addition, there is a constellation of associated factors that may be influenced by overnutrition and sedentary lifestyle. MetS represents a common clinical condition in countries where obesity and so-called Western (unhealthy) dietary patterns prevail. In close association with the rising obesity epidemic, the prevalence of MetS is also increasing to epidemic proportions, which entails substantial healthcare costs. The importance of MetS lays in its associated risk of cardiovascular (CV) disease (CVD) and type 2 diabetes (T2DM), as well as other harmful conditions such as nonalcoholic fatty liver disease. Currently, there is no effective preventive approach beyond lifestyle-based interventions aimed at normalizing body weight and achieving and maintaining cardio-metabolic control, including lipid levels, blood glucose, and blood pressure (BP). From a nutritional perspective, the available evidence suggests certain nutrients, foods, and dietary patterns have beneficial effects on MetS, and result in improved metabolic profiles both in the presence or absence of weight loss, but there is no definitive agreement on which nutritional approach is the best.<sup>1–3</sup> Thus, the aim of the present position statement is to update and focus current thinking on the role of lifestyle recommendations for the management of MetS.

In this article, the following levels of evidence (grades) are used to summarize the available scientific evidence and guide recommendations for the prevention and treatment of MetS: A: evidence from meta-analyses that

incorporated quality ratings in the analysis or well-conducted randomized controlled trials (RCTs); B: evidence from prospective cohort studies or case-control studies; and C: expert consensus/opinion or clinical experience.

The information presented here is intended to provide a useful framework for patients, researchers, clinicians, policy makers, and other stakeholders to understand and implement the most effective approaches for lifestyle change to improve cardiometabolic health in individuals with MetS.

## Definition of metabolic syndrome

In the absence of a single definition, several closely related but individual definitions have been proposed for MetS. In 2001, the National Cholesterol Education Program Adult Treatment Panel III defined MetS as  $\geq 3$  of the following risk factors occurring together: abdominal obesity, atherogenic dyslipidemia, hypertension, and insulin resistance.<sup>4</sup> The International Diabetes Federation defined MetS as central obesity in addition to any 2 of the following: raised triglyceride (TG) levels, low high-density lipoprotein cholesterol (HDL-C) levels, hypertension, and elevated fasting plasma glucose.<sup>5</sup> The American Diabetes Association in conjunction with the European Association for the Study of Diabetes stated there was no need for the term MetS because all of its associated factors are treated individually once diagnosed.<sup>6</sup> The debate over the use of the term MetS continues, as noted by the World Health Organization<sup>7</sup>; what is not disputed, is that the factors underlying MetS are increasing worldwide. In 2005, the

American Heart Association/National Heart, Lung and Blood Institute also suggested criteria for the diagnosis of MetS.<sup>8</sup> Finally, in 2009, an attempt was made to reconcile existing definitions.<sup>9</sup> This integrated definition of MetS assigns equal levels of importance to all of its components; abdominal obesity as measured by waist circumference (WC), elevated TGs, low HDL-C, elevated BP, and elevated fasting glucose.<sup>9</sup> Despite the efforts by many organizations to provide a more unified definition, these conflicting definitions indicate that caution should be exercised when comparing studies.

The prevalence of MetS has increased over time and is now reaching epidemic proportions. In Western countries, the estimated prevalence of MetS is approximately one-fifth of the adult population, and this increases with age.<sup>10</sup> However, the prevalence of MetS is dependent on the population studied, age, sex, race, and ethnicity, as well as the definition used.

### WINE, ALCOHOL, AND METABOLIC SYNDROME

High alcohol consumption has been associated with an increased risk of death from several conditions, including liver cirrhosis, chronic pancreatitis, hypertension, cardiomyopathy, some cancers, injuries, and violence.<sup>11</sup> However, the results of several studies show a significant reduction in the risk of CVD events and all-cause mortality from light/moderate intake of alcoholic beverages: a J-shaped curve.<sup>12</sup> Regarding MetS, several studies have found an association between alcohol drinking and the prevalence of MetS and most of its components.<sup>13</sup> Although alcohol intake is positively correlated with plasma HDL-C concentration,<sup>14</sup> high alcohol intake has unfavorable effects on abdominal obesity, TG concentrations, BP, and, possibly, insulin sensitivity.<sup>15–18</sup> However, the effects differ when the daily dose of alcohol and the type of alcoholic beverage consumed are considered. A meta-analysis of observational studies<sup>19</sup> concluded that a favorable metabolic effect appeared to be restricted to moderate alcohol intake (<20 g/d for women and <40 g/d for men). With respect to the type of alcoholic beverages, some authors have not found differences in MetS rates among consumers of different alcoholic drinks, but others have reported lower rates among wine and beer drinkers.<sup>20,21</sup> In the PReención con DIeta MEDiterránea (PREDIMED) trial, which included 7447 individuals at high CV risk, moderate wine drinkers ( $\geq 1$  drink(s)/d) showed a reduced risk of prevalent MetS by 44%, compared with nondrinkers. In fact, moderate wine drinkers showed a lower risk of having abnormal WC, low HDL-C, high BP, and high fasting plasma glucose levels. This association was stronger for women, persons aged <70 years, and former or current smokers.<sup>22</sup> Similarly, in the Life Lines Cohort Study, which included 64 046 participants,

the overall metabolic profile of wine drinkers was better than that of nondrinkers or drinkers of beer or spirits.<sup>13</sup> The protective effects of moderate beer intake seem to be lower than those of wine.<sup>13</sup> Besides containing alcohol, red wine is rich in polyphenols, which may beneficially influence carbohydrate metabolism<sup>23</sup> and BP.<sup>24</sup> Clinical studies have shown that other foods rich in polyphenols raise HDL-C concentrations.<sup>25</sup> Several studies,<sup>26,27</sup> but not all,<sup>28</sup> have found that wine drinkers had a significantly lower body mass index (BMI) and WC compared with nondrinkers. A long-term randomized intervention trial that included 224 patients with well-controlled T2DM demonstrated that moderate consumption of red wine reduced the number of MetS components by 65%. In addition, slow ethanol metabolizers significantly benefit from the effects of wine on glycemic control (fasting plasma glucose, homeostatic model assessment of insulin resistance, and hemoglobin A<sub>1c</sub>) compared with fast ethanol metabolizers, suggesting that ethanol in wine plays a role in the protective effect.<sup>29</sup>

In summary, compared with abstainers and heavy drinkers, moderate wine drinkers have shown a lower prevalence of MetS and 4 of its 5 components—namely, increased WC, low HDL-C, high BP, and hyperglycemia. Moderate beer drinkers also exhibit a lower prevalence of MetS, but beer appears to be less effective than wine in protecting from MetS. Liquor and spirit intake increase the risk of MetS. The literature suggests that long-term moderate intake of red wine and beer may protect against developing MetS. It is also possible that confounding factors like more diseases among abstainers and heavy drinkers may influence the prevalence of MetS and alcohol exposure. Thus, intervention studies are needed to evaluate the potential benefit of moderate wine and beer intake in mitigating MetS and the associated increased risk of mortality, CVD, T2DM, and some types of cancer. Table 1 shows the grading of the evidence and recommendations regarding alcohol consumption and MetS.

### SMOKING AND METABOLIC SYNDROME

A meta-analysis of 13 prospective cohort studies with a combined total of 56 691 participants and 8688 MetS cases demonstrated that active smokers have a 26% increased risk of MetS compared with nonsmokers.<sup>30</sup> Slagter et al.<sup>31</sup> evaluated data from 24 389 men and 35 078 women participating in the Life Lines Cohort Study and found that this association applies to both sexes (odds ratio [OR], 1.7–2.4 for men and 1.8–2.3 for women; all  $P < .001$ ) and different BMIs. Also, Hwang et al.<sup>32</sup> found a dose-response association between smoking and MetS in men. However, in the Multi-Ethnic Study of Atherosclerosis with 5913 participants, the prevalence of MetS was similar among 3 groups with

**Table 1 Grading of the evidence and recommendations regarding alcohol consumption and metabolic syndrome**

| Evidence and recommendation                                                                                                             | Grade |
|-----------------------------------------------------------------------------------------------------------------------------------------|-------|
| <b>Evidence</b>                                                                                                                         |       |
| Compared with abstainers and heavy drinkers, moderate wine drinkers have a lower prevalence of metabolic syndrome <sup>22–24</sup>      | B     |
| Moderate beer drinkers exhibit a lower prevalence of metabolic syndrome, but beer appears to be less protective than wine <sup>13</sup> | B     |
| Liquor and spirit intake increase the risk of metabolic syndrome <sup>15–17</sup>                                                       | B     |
| <b>Recommendation</b>                                                                                                                   |       |
| Long-term moderate intake of red wine and beer may protect against developing metabolic syndrome <sup>13,22–24</sup>                    | B     |

differing smoking status.<sup>33</sup> The prevalence of MetS risk factors (except impaired fasting glucose) differs among current, former, and nonsmokers. The Coronary Artery Risk Development in Young Adults study with 4192 participants found that baseline smoking status was not predictive of the occurrence of MetS during 13.6 years of follow-up, although data on former smokers were lacking, which, may have influenced the risk of MetS.<sup>34</sup>

Smoking may increase MetS risk by several mechanisms. Nicotine released during smoking stimulates the release of several neurotransmitters and hormones (catecholamines, vasopressin, corticotropin-releasing hormone, adrenocorticotrophic hormone, growth hormone, and others).<sup>35</sup> High levels of inflammatory biomarkers such as C-reactive protein have been shown to be elevated in smokers compared with nonsmokers.<sup>36</sup> Low HDL-C and increased TGs are frequently present due to an increased release of free fatty acids as a consequence of lower lipoprotein lipase activity, higher 3-hydroxy-3-methyl-glutaryl-coenzyme A reductase activity, and higher glucose-6-phosphatase dehydrogenase activity, leading to increased hepatic very-low-density lipoprotein synthesis.<sup>37</sup> Also, in current smokers, the higher prevalence of increased WC despite lower BMI is attributable to increased cortisol production, which leads to accumulation of abdominal fat. Moreover, smokers tend to have insulin resistance due to the effects of cotinine (a metabolite of nicotine), carbon monoxide, cortisol, and growth hormone. The Multi-Ethnic Study of Atherosclerosis,<sup>33</sup> reported, however, that smokers had a lower prevalence of insulin resistance compared with nonsmokers, probably because of a lower BMI. Nevertheless, when adjustments were made for BMI, smokers were at a higher risk of MetS than nonsmokers.<sup>33</sup>

### Smoking cessation

Wada et al.<sup>38</sup> found that, after smoking cessation, the risk of MetS increased and remained high for at least 10

years in the individuals who smoked  $\geq 20$  cigarettes per day and for  $> 20$  years in those who smoked  $\geq 40$  cigarettes per day. In this context, in an adult Puerto Rican population, Calo et al.<sup>39</sup> found that MetS was more prevalent in former smokers (48.4%) compared with current (42.7%) and nonsmokers (40.0%). Another study that included 4542 men without MetS at baseline who were followed for an average of 3 years also showed this pattern (8.0% MetS incidence in nonsmokers, 7.1% in new smokers, 17.1% in ex-smokers, and 13.9% in current smokers).<sup>40</sup> In contrast, other researchers<sup>41</sup> found no differences between smokers and nonsmokers regarding total body fat and/or body fat distribution. Thus, smoking cessation programs should include life-style interventions to offset the MetS-augmenting side effect of smoking cessation.

Regarding smoking cessation and diabetes, in a meta-analysis of 88 studies that involved a combined total of 5 898 795 participants and 295 446 incident cases of T2DM, Pan et al.<sup>42</sup> found that the risk of developing T2DM increased in recent quitters but decreased noticeably as time passed after smoking cessation.

Regarding weight gain following smoking cessation, it needs to be emphasized that smoking, particularly in individuals with poor socioeconomic status, is associated with unhealthy diets, increased alcohol consumption, and limited physical activity, which are all behaviors that remain after quitting and may potentially enhance weight gain.<sup>43–45</sup> Table 2 shows the grading of the evidence and recommendations regarding smoking and MetS.

### PHYSICAL ACTIVITY AND METABOLIC SYNDROME

Physical inactivity is identified as the fourth leading risk factor for global mortality.<sup>46</sup> Regular physical activity leads to enhanced energy consumption and is associated with reduced risk of prevalent diseases such as obesity, MetS, T2DM, CVD, cognitive impairment, depression, and osteoporosis.<sup>47</sup> In MetS, the excess energy that is accumulated in adipose tissue and also stored ectopically in nonadipose tissues like the liver will cause metabolic disturbances that lead to increases in BP, blood glucose, TGs, and inflammation.<sup>48</sup> These metabolic alterations can be prevented or reduced if physical activity is performed daily, preferentially involving large muscle groups. Any type of physical activity is better than inactivity, and increasing physical activity may also have substantial beneficial effects on personal well-being.<sup>49</sup> Although there are gaps in the present knowledge of how long, what type, and during what periods of life people should exercise, the available scientific evidence can be summarized as outlined in Box 1:<sup>50–54</sup>



**Table 2 Grading of the evidence and recommendations regarding smoking and metabolic syndrome**

| Evidence and recommendation                                                                                                                         | Grade |
|-----------------------------------------------------------------------------------------------------------------------------------------------------|-------|
| <b>Evidence</b>                                                                                                                                     |       |
| Smoking increases the risk of metabolic syndrome <sup>30–32</sup>                                                                                   | B     |
| There is an increased risk of developing metabolic syndrome after quitting smoking <sup>38–40</sup>                                                 | B     |
| <b>Recommendation</b>                                                                                                                               |       |
| Stop smoking to prevent and treat metabolic syndrome. Smokers unable to quit smoking should be referred to a smoking cessation clinic <sup>42</sup> | A     |
| Obese and overweight individuals should adopt a calorie-restricted diet after quitting smoking <sup>44,45</sup>                                     | B     |
| United States Food and Drug Administration–approved medications for smoking cessation may be considered to decrease postcessation weight gain       | C     |

**Box 1 Summary of available evidence on physical activity**

- Observational studies of people with different levels of physical inactivity indicate that increasing physical activity is beneficial<sup>55,56</sup>
- Inactive people should start increasing physical activity slowly and gradually<sup>57</sup>
- Brisk walking is the preferred initial exercise modality<sup>46,57</sup>
- 30–60 min of daily physical activity is recommended, including aerobic exercise, work-related activity, and muscle strengthening<sup>58</sup>
- Physical activity can be accumulated throughout the day in blocks as short as 10 minutes
- A dose–response relationship exists between physical activity and health; the beneficial effects are greater when exceeding minimum recommendations
- Physical activity must be individualized based on fitness and comorbidities

It is very important to keep body weight as near to normal as possible for both prevention and treatment of MetS because its pathophysiology relates to a positive energy balance, with surplus fat stored in adipose tissue and ectopic tissues such as the liver, pancreas, skeletal muscle, and around upper airways and inner organs.<sup>59</sup> Life-style changes consisting of enhanced physical activity together with reduced energy intake (see below) are instrumental to both prevent and treat MetS. Table 3 shows the grading of the evidence and recommendations regarding physical activity and MetS.

## METABOLIC SYNDROME AND WEIGHT CONTROL

Obesity and MetS are intimately related. It is, therefore, difficult to separate their effects on the risk of vascular events or T2DM.<sup>60</sup> Nevertheless, weight loss will

**Table 3 Grading of the evidence and recommendations regarding physical activity and metabolic syndrome**

| Evidence and recommendation                                                                                                             | Grade |
|-----------------------------------------------------------------------------------------------------------------------------------------|-------|
| <b>Evidence</b>                                                                                                                         |       |
| Physical activity has substantial beneficial effects on metabolic syndrome <sup>50–54</sup>                                             | A     |
| <b>Recommendation</b>                                                                                                                   |       |
| Physical activity must be individualized based on fitness and comorbidities <sup>57</sup>                                               | C     |
| 30–60 min of daily physical activity is recommended, including aerobic and work-related activity and muscle strengthening <sup>58</sup> | B, C  |

decrease the prevalence of MetS. Obesity is not necessarily always associated with MetS, but it will adversely affect the MetS diagnostic criteria, which include WC and BP, as well as HDL-C, TGs, and fasting blood glucose levels.<sup>9,61</sup> There are other characteristics that are shared between obesity and MetS—for example, elevated levels of serum uric acid, postprandial hypertriglyceridemia, dysfunctional HDL, increased small dense LDL, nonalcoholic fatty liver disease (the hepatic expression of MetS), insulin resistance, endothelial dysfunction, arterial stiffness, epicardial fat accumulation, prothrombotic state, abnormal adipokine levels, increased inflammation, and obstructive sleep apnea.<sup>62,63</sup>

Obesity has traditionally been defined by the BMI, but cutoff values for BMI (and WC) vary by ethnicity. Therefore, it is probably more appropriate to use the Joint Interim Statement definition of MetS (October 2009), which includes WC definitions based on ethnicity.<sup>9</sup> Using uniform definitions of obesity and MetS will enable comparisons between studies because the various definitions of MetS result in significantly different assessments of vascular risk.<sup>64,65</sup>

Several diets were proposed in the past and will be promoted in the future to treat obesity. This in itself indicates there is no single perfect diet for weight loss. Calorie restriction plus exercise are time-honored criteria. Importantly, results from RCTs have shown that high-fat diets are equally effective or superior to low-fat diets for weight loss.<sup>66</sup> Regarding specific dietary patterns, probably the Mediterranean diet (MedDiet), a high-vegetable fat dietary pattern, is the best strategy to reduce incidence and lower the prevalence of MetS and its components.<sup>67</sup>

Insulin resistance is not a *sine qua* diagnostic component of MetS. Nevertheless, it is a common feature of both obesity and MetS. Improving insulin sensitivity will, in turn, result in beneficial effects on the MetS components BP, HDL-C, TGs, and blood glucose. Weight loss or medications (eg, metformin or pioglitazone) can increase insulin sensitivity. In turn, weight loss can be assisted by lifestyle measures and medication

**Table 4 Grading of the evidence and recommendations regarding weight control and metabolic syndrome**

| Evidence and recommendation                                                                                                                       | Grade |
|---------------------------------------------------------------------------------------------------------------------------------------------------|-------|
| <b>Evidence</b>                                                                                                                                   |       |
| There is no optimal diet for weight loss, but calorie restriction plus exercise are instrumental for losing weight <sup>66</sup>                  | B     |
| <b>Recommendation</b>                                                                                                                             |       |
| A healthy diet designed to achieve 5% weight loss should be prescribed for overweight and obese patients with metabolic syndrome <sup>66,67</sup> | A     |

(eg, naltrexone + bupropion, liraglutide, orlistat, lorcaserin, and phentermine + topiramate).<sup>68</sup> Bariatric surgery can be used for the morbidly obese or for those with a lesser degree of obesity but with CVD risk factors.<sup>69</sup> Each abnormality associated with obesity and/or MetS can be addressed individually. Weight loss achieved by lifestyle or surgical interventions may also improve coronary circulatory dysfunction.<sup>70</sup> There is also a need to address modifiable risk factors if patients are judged to be at high risk of vascular events, even if their risk is not directly related to obesity or MetS. Options include smoking cessation, decreasing raised LDL-C levels, and prescribing antiplatelet agents.<sup>71</sup> Table 4 shows the grading of the evidence and recommendations regarding weight control and MetS.

## INFLUENCE OF DIET ON METABOLIC SYNDROME

### Mediterranean diet and metabolic syndrome

The term Mediterranean diet refers to the traditional dietary pattern of countries in the Mediterranean basin. It is a plant-based diet, including sizable quantities of fruits, vegetables, whole-grain cereals, legumes, nuts, and olive oil as the principal source of fat. It also includes fish and poultry in low to moderate amounts, a relatively low amount of red meat, and moderate daily consumption of alcohol, normally as red wine taken with meals.<sup>72</sup> The MedDiet is a high-fat dietary pattern because the total fat content ranges from 35% to 45% of energy, but most of that fat is unsaturated because olive oil is used abundantly in the kitchen and at the table. Because the MedDiet has been consistently shown to be cardioprotective,<sup>73</sup> it exemplifies the fact that high-fat diets can be beneficial for CV health if salutary vegetable fats are consumed.<sup>74</sup>

Regarding the MedDiet and CV health, both prospective cohort studies and RCTs have suggested that this dietary pattern is protective against the development of MetS and its individual components.<sup>75–78</sup> Based on the results of a meta-analysis of 50 independent studies and 534 906 individuals, adherence to the

**Table 5 Grading of the evidence and recommendations regarding the Mediterranean diet and metabolic syndrome**

| Evidence and recommendation                                                                                                                                                               | Grade |
|-------------------------------------------------------------------------------------------------------------------------------------------------------------------------------------------|-------|
| <b>Evidence</b>                                                                                                                                                                           |       |
| Mediterranean diet can be a useful strategy for preventing cardiovascular diseases and diabetes in individuals with metabolic syndrome <sup>75–77,79</sup>                                | B     |
| <b>Recommendation</b>                                                                                                                                                                     |       |
| Mediterranean diet, with or without energy restriction, can be recommended for all people with metabolic syndrome as an effective component of the treatment strategy <sup>76,77,79</sup> | B     |
| Minimally processed, seasonally fresh, and locally grown foods are preferred <sup>73,74</sup>                                                                                             | C     |

MedDiet was associated with 50% reduction in the prevalence of MetS compared with nonadherence.<sup>79</sup> Moreover, the MedDiet showed beneficial effects on the common MetS components of abdominal obesity, dyslipidemia, elevated fasting blood glucose, and high BP, which are also risk factors for the development of CVD and T2DM.<sup>79,80</sup> Finally, in both sexes, MetS has been associated with sexual dysfunction that can be improved by adoption of the MedDiet.<sup>81</sup> The antioxidant and anti-inflammatory effects of the MedDiet could offer a possible explanation for its beneficial effects on MetS.<sup>75,82,83</sup> Adoption of the MedDiet may, thus, be important for both prevention and resolution of MetS. It is not by chance that this dietary pattern was recognized as an Intangible Cultural Heritage of Humanity by (UNESCO) in 2010, emphasizing not only the food consumption aspects, but also its cultural roots, including conviviality, socialization, biodiversity and seasonality, culinary activities, physical activity, and adequate rest. Table 5 shows the grading of the evidence and recommendations regarding the MedDiet and MetS.

### Olive oil and metabolic syndrome

Olive oil is probably the most representative component of the MedDiet. As discussed, the olive oil-rich MedDiet reversed MetS status in several RCTs<sup>75,76,84</sup> and reduced its incidence in observational studies.<sup>79</sup> This article focuses on the available evidence from RCTs concerning the benefits of olive oil at doses of 20–50 g/d, independent of the background diet, on MetS and its individual features. Virgin and extra-virgin olive oil have as a major component oleic acid, a monounsaturated fatty acid (MUFA), but they also contain minor components with bioactive properties.<sup>85</sup> Monounsaturated fatty acid consumption promotes beneficial blood lipid profiles, improves insulin sensitivity, and regulates blood glucose levels.<sup>86–88</sup> Dietary olive

oil and virgin olive oil, in contrast with other vegetable oils, reduced the risk of MetS,<sup>25</sup> the need for antihypertensive medication,<sup>89</sup> and systolic BP.<sup>90</sup> Recent evidence from the PREDIMED trial indicates that a MedDiet enriched with extra-virgin olive oil is not associated with weight gain in an older, mostly overweight or obese population at high CV risk.<sup>91</sup>

Oxidation and inflammation are mechanisms linked to MetS.<sup>92,93</sup> Oxidative stress is associated with the number of components of MetS.<sup>93</sup> Monounsaturated fatty acid-rich diets are more effective than those rich in polyunsaturated fatty acids (PUFAs) for reducing the resistance of LDL to oxidation.<sup>94</sup> Olive oil consumption has been found to decrease in vivo HDL oxidation, which would impair HDL function (ie, cholesterol efflux from cells).<sup>95</sup> The beneficial effect of olive oil on inflammation<sup>96</sup> could be conveyed through a transcriptional effect by decreasing the expression of proinflammatory genes.<sup>97,98</sup>

Minor components of olive oil also play a beneficial role in MetS. For example, pomace olive oil, rich in triterpenes, was found to decrease postprandial TG-rich lipoproteins.<sup>99</sup> Compared with a low-phenolic olive oil, virgin olive oil, rich in phenolic compounds, was associated with an improved lipid profile, anti-inflammatory effect, lower systolic BP,<sup>85,100,101</sup> and improved expression of inflammatory and HDL-C efflux-related genes.<sup>102,103</sup>

These results indicate that olive oil as a dietary fat is a useful tool in the management of MetS. To achieve its benefits, a similar amount of consumed fat must be replaced by olive oil without increasing the total number of calories per day. On the basis of the health claims authorized by the United States Food and Drug Administration and the European Food Safety Authority, the recommended daily quantities are conservative: 23 g/d (2 tablespoons) for olive oil<sup>104</sup> and 20 g/d for phenolic-rich virgin olive oil,<sup>105</sup> respectively. In the PREDIMED study, daily consumption of 35–45 g/d of virgin olive oil for 5 years within the frame of a MedDiet pattern reversed MetS, mainly by reducing abdominal adiposity.<sup>76</sup> Low-density lipoprotein oxidation was also decreased by the MedDiet enriched with olive oil.<sup>106</sup> In the EUROLIVE study, conducted in different European countries, consumption of 25 mL/d (22 g/d) of any type of unheated olive oil in substitution of other fats during 3-week periods decreased TGs and systolic BP.<sup>90</sup> In the same study, an increase in HDL-C levels and function and a decrease in LDL oxidation and in the expression of inflammatory-related genes were directly related to the phenolic content of the olive oil administered.<sup>102,107</sup> Recommended daily doses of OO as the main source of dietary fat in American and European nutritional guidelines range 30–78 g/d

**Table 6 Grading of the evidence and recommendations regarding olive oil and metabolic syndrome**

| Evidence and recommendation                                                                                                                                                  | Grade |
|------------------------------------------------------------------------------------------------------------------------------------------------------------------------------|-------|
| <b>Evidence</b>                                                                                                                                                              |       |
| Olive oil in replacement of other fats is useful for metabolic syndrome prevention and management <sup>85–87</sup>                                                           | B     |
| <b>Recommendation</b>                                                                                                                                                        |       |
| Daily consumption of olive oil at doses of 20–40 g/d in replacement for other fats is useful in the prevention and treatment of metabolic syndrome <sup>76,104,105,108</sup> | A     |

depending on body weight.<sup>108</sup> Thus, olive oil doses around 40–45 g/d for culinary use and dressing vegetables and around 20–25 g/d for nonculinary use in replacement of other fats could be appropriate for MetS prevention and management. Table 6 shows the grading of the evidence and recommendations regarding olive oil consumption and MetS.

### Dietary patterns and metabolic syndrome: beyond the Mediterranean diet

The importance of individual dietary components was assessed in several studies. However, because nutrients may have a synergistic effect on disease, it is more realistic to study dietary patterns. Reviewed here is the current evidence from prospective studies and RCTs on well-recognized dietary patterns other than the MedDiet.

**Western-type diets.** Consumption of Western diets, which are characterized by high intakes of red meat, processed foods, refined grain, sugars, and saturated fatty acids, has been associated with a higher prevalence of MetS in women<sup>109</sup> but not in elderly adults.<sup>110</sup> A prospective analysis conducted within the Atherosclerosis Risk in Communities study indicated an 18% greater risk of incident MetS for individuals with the highest Western dietary pattern score.<sup>111</sup>

**The Dietary Approaches to Stop Hypertension diet.** The Dietary Approaches to Stop Hypertension (DASH) diet proved to be effective for controlling BP and improving the lipid profile, glucose metabolism, and other CV risk factors.<sup>112</sup> However, observational data on the association between the DASH diet and MetS are scarce. An initial approach using the OmniHeart database revealed fewer MetS components in individuals following a DASH diet.<sup>113</sup> More recently, a cross-sectional analysis conducted in Iranian women suggested that individuals with a greater adherence to the DASH diet had a lower prevalence of MetS and most of its features after

controlling for potential confounders.<sup>114</sup> Likewise, findings from RCTs also suggested that the DASH diet has beneficial effects on MetS in both adults and children.<sup>112,115</sup>

*The new Nordic diet.* The Nordic diet is based on foods from Nordic countries. It contains increased amounts of plant foods, fish, and fish products (mainly fatty fish) from the sea and lakes, and mushrooms, berries, and other traditional fruits. A RCT has investigated the impact of the Nordic diet on MetS components. A total of 200 adults with MetS were randomized to a Nordic diet or a control diet for 18–24-week periods. The participants' lipid profiles improved significantly after the intervention diet, whereas changes in body weight, insulin sensitivity, and BP were not statistically significant.<sup>116</sup>

*Vegetarian diets.* The health benefits of strictly plant-based or vegetarian diets have mainly been assessed in the Seventh-day Adventist prospective cohorts and in studies of British vegetarians. In a cross-sectional analysis of 773 participants from the Adventist Health Study-2, a vegetarian dietary pattern was associated with a significantly lower risk of prevalent MetS than a nonvegetarian diet.<sup>117</sup> The protective effect of vegetarian diets on MetS has also been observed in other epidemiological studies conducted mostly in Asian populations, but the finding is not consistent.<sup>118</sup> No RCTs testing the effect of vegetarian diets on MetS or its components could be located in the existing literature.

*Other dietary patterns.* Other dietary patterns that have a high carbohydrate content and are rich in whole grains or high in protein have shown beneficial effects on MetS components in several trials.<sup>119</sup> However, the proportions of each macronutrient have not been well defined, and little information is available from large-scale observational studies.

Table 7 shows the grading of the evidence and recommendations regarding dietary patterns and MetS.

### Legumes and metabolic syndrome

Legumes are seeds that are rich in protein, complex carbohydrates, fiber, and various bioactive micronutrients; their effects on blood glucose regulation have been tested in several RCTs and they were found to reduce postprandial blood glucose and insulin excursions. This effect is mediated by slow carbohydrate absorption that results in improved glycemic control.<sup>120</sup> To date, few studies have examined the association of legume consumption with MetS.<sup>121</sup> The Isfahan Healthy Heart Program reported that all components of MetS were

**Table 7 Grading of the evidence and recommendations regarding particular diets and metabolic syndrome**

| Evidence and recommendation                                                                                                                                                                                                          | Grade |
|--------------------------------------------------------------------------------------------------------------------------------------------------------------------------------------------------------------------------------------|-------|
| <b>Evidence</b>                                                                                                                                                                                                                      |       |
| Western dietary patterns are detrimental for metabolic syndrome and its components <sup>109,111</sup>                                                                                                                                | B     |
| The Dietary Approaches to Stop Hypertension diet improves several components of metabolic syndrome <sup>112–115</sup>                                                                                                                | A     |
| Other dietary approaches such as the new Nordic diet or vegetarian diets are potentially effective to modulate metabolic syndrome components <sup>116</sup>                                                                          | B     |
| <b>Recommendation</b>                                                                                                                                                                                                                |       |
| The Dietary Approaches to Stop Hypertension diet, new Nordic diet, and plant-based/vegetarian diets can be recommended for people with metabolic syndrome as an effective component of the treatment strategy <sup>109,111–116</sup> | B     |

less prevalent among individuals with regular legume consumption.<sup>121</sup> Other studies have related bean consumption to lower systolic BP, smaller WC, and lower body weight.<sup>122,123</sup> Furthermore, a population-based, cross-sectional study showed a substantial reduction in the risk of MetS with increased legume fiber intake.<sup>124</sup> Moreover, studies performed in diabetic patients revealed that higher consumption of legumes improved glycemic control and insulin resistance.<sup>125–127</sup> Finally, RCTs have shown beneficial effects of legumes on CV risk factors, such as lipids (TG) and BP.<sup>128,129</sup> In this regard, a recent meta-analysis of RCTs suggested a slight BP-lowering effect of legumes, but marked heterogeneity among studies precludes drawing firm conclusions.<sup>130</sup> In summary, the evidence suggests that eating a variety of legumes is beneficial in the prevention and management of MetS, T2DM, and CVD.<sup>131</sup> Table 8 shows the grading of the evidence and recommendations regarding legume consumption and MetS.

### Cereals and metabolic syndrome

Cereals and cereal-derived products are a staple for many world populations and an important component of a healthy dietary pattern. They have relatively low calorie density and may contribute to maintaining energy balance. Several epidemiologic studies have assessed the association of MetS with dietary fiber, mainly fiber derived from cereal consumption, and concluded that there is an inverse association.<sup>132,133</sup> A population-based, cross-sectional study evaluated the association between total dietary fiber and its types and sources with the risk of MetS. Those in the highest tertile of cereal fiber intake had lower odds of MetS compared with those in the lowest tertile (OR = 0.73; 95% confidence interval = .52–.97), but the association was no longer



**Table 8 Grading of the evidence and recommendations regarding legumes and metabolic syndrome**

| Evidence and recommendation                                                                                                                                                        | Grade |
|------------------------------------------------------------------------------------------------------------------------------------------------------------------------------------|-------|
| <b>Evidence</b>                                                                                                                                                                    |       |
| Eating a variety of legumes is beneficial in the prevention and management of metabolic syndrome <sup>124–129</sup>                                                                | B     |
| <b>Recommendation</b>                                                                                                                                                              |       |
| Daily consumption of legumes is recommended to improve cardio-metabolic risk factors <sup>128,129,131</sup>                                                                        | A     |
| Legumes can be recommended for people with metabolic syndrome as an effective component in prevention and management of diabetes and cardiovascular disease <sup>121–124,131</sup> | A     |

significant after adjusting for confounders.<sup>124</sup> Few long-term studies have examined the relation between breakfast cereal consumption and diabetes risk. There is some evidence supporting the role of breakfast cereals, especially those high in fiber, in the management of T2DM, but the evidence is not strong.<sup>134</sup> Evidence for the relation between breakfast cereals and hypertension is limited. The most convincing evidence comes from the Physicians' Health Study,<sup>135</sup> which found a 19% reduction in hypertension risk with daily breakfast cereal consumption and a stronger relation with whole-grain than with refined-grain cereals. The authors suggested a number of components in cereals, including folate, magnesium, potassium, and fiber, may be responsible for this effect. However, these results were obtained from physicians who are likely to have generally healthy lifestyles, and the results do not provide any data on hypertension risk in women. Table 9 shows the grading of the evidence and recommendations regarding cereals and MetS.

### Fruits, vegetables, and metabolic syndrome

Consumption of fruits and vegetables has been shown to have favorable effects on a wide spectrum of clinical outcomes, and, to that extent, most dietary guidelines emphasize their importance. Indeed, the cardiometabolic benefit ascribed to plant-based dietary patterns such as the MedDiet, DASH diet, and vegetarian diets can be ascribed, to a large extent, to their richness in fruits and vegetables. However, because they are complex food patterns, the specific contribution of the fruits and vegetables component to attenuating the risk of MetS cannot be determined, and the epidemiological evidence relating their intake to incident MetS is relatively scarce. Epidemiological studies conducted mostly in Asian populations have reported a more favorable cardiometabolic risk profile and reduced risk of MetS among individuals following plant-based diets (vegan

**Table 9 Grading of the evidence and recommendations regarding cereals and metabolic syndrome**

| Evidence and recommendation                                                                                                    | Grade |
|--------------------------------------------------------------------------------------------------------------------------------|-------|
| <b>Evidence</b>                                                                                                                |       |
| Eating a variety of cereals (whole grains) is beneficial in the prevention and management of metabolic syndrome <sup>133</sup> | B     |
| <b>Recommendation</b>                                                                                                          |       |
| Daily consumption of cereals (whole grains) is recommended for cardiometabolic health <sup>132–135</sup>                       | A     |
| Cereals can be recommended for people with metabolic syndrome <sup>133,134</sup>                                               | B     |

and vegetarian) compared with omnivores.<sup>118</sup> Again, favorable impacts of such complex diets cannot be ascribed only to intake of fruits and vegetables. However, a meta-analysis of 5 prospective studies showed that total fruits and vegetables intake, but not intake of specific subtypes of fruits or vegetables, was associated with a lower relative risk of T2DM.<sup>136</sup> Green leafy vegetables showed the strongest protective association with incident T2DM.<sup>136,137</sup>

A meta-analysis of RCTs suggested that intake of fruits and vegetables reduces diastolic BP but has no impact on other features of MetS such as WC, systolic BP, fasting glucose, HDL-C, or TG levels in patients with MetS.<sup>138</sup> This analysis is based, however, on only 8 RCTs, so the data must be interpreted with caution. Increasing consumption of fruits and vegetables from 1 serving per day to 6–7 servings per day for 12 weeks also had no effect on insulin resistance in overweight individuals<sup>139</sup> or on a wide spectrum of inflammatory and oxidative stress markers in hypertensive individuals.<sup>140</sup>

In summary, data from epidemiological studies suggest that consumption of fruits and vegetables may reduce the risk of MetS. Beyond differences in study designs, factors such as duration of intervention and the “doses” of fruits and vegetables investigated need to be considered when trying to reconcile data from epidemiological studies and clinical trials. Displacing potentially unhealthy foods with fruits and vegetables in the diet also needs consideration when assessing the potential effect of fruit and vegetable intake on MetS and health in general. Although increased consumption of fruits and vegetables appears to be a justifiable and logical recommendation to manage the risk of MetS, further investigations are warranted to establish the extent to which such intake specifically contributes to the favorable health effects of dietary patterns such as the MedDiet or the DASH diet on MetS. Table 10 shows the grading of the evidence and recommendations regarding fruit and vegetable consumption and MetS.

**Table 10 Grading of the evidence and recommendations regarding fruit/vegetable intake and metabolic syndrome**

| Evidence and recommendation                                                                                                                                                                                                            | Grade |
|----------------------------------------------------------------------------------------------------------------------------------------------------------------------------------------------------------------------------------------|-------|
| <b>Evidence</b>                                                                                                                                                                                                                        |       |
| Eating a variety of fruits and vegetables is beneficial in the prevention and management of metabolic syndrome <sup>138</sup>                                                                                                          | C     |
| <b>Recommendation</b>                                                                                                                                                                                                                  |       |
| Although the association between intake of fruits and vegetables and features of metabolic syndrome remains unclear, consumption of fruits and vegetables should be an integral part of a healthy and balanced diet <sup>136–138</sup> | A     |

## Fish and metabolic syndrome

Consistent evidence from epidemiological studies indicates that consumption of fish (especially fatty fish) or intake of fish oil supplements rich in n-3 fatty acids relates to CV protection, especially coronary heart disease mortality.<sup>141</sup> Evidence from RCTs, however, is controversial.<sup>142</sup> Several studies have also shown beneficial effects of fish consumption on CV risk factors such as body weight, the lipid profile, BP, and insulin levels.<sup>143</sup> In cross-sectional analyses, a dietary pattern including frequent consumption of fish, cereals, legumes, vegetables, and fruits resulted in a lower likelihood of having MetS compared with dietary patterns in which consumption of potatoes, meat, and alcohol predominated in a Greek population sample<sup>144</sup>; in a Korean population, this dietary pattern was also inversely associated with the risk of hypertriglyceridemia and MetS.<sup>145</sup> Moreover, an inverse relationship has been found between central adiposity and fish consumption.<sup>146</sup> Evidence suggests that the beneficial effect of fish oil (long-chain n-3 PUFA) on MetS is mediated by improving dyslipidemia and adipose tissue storage and secretory functions, as well as reducing inflammation.<sup>147</sup> Also, a combination of fatty fish with bilberries and whole-grain products improved endothelial dysfunction and inflammation in overweight and obese individuals<sup>147</sup> and decreased MetS risk.<sup>148</sup> In a 4-year prospective Korean study, high consumption of fish and n-3 fatty acids resulted in lower MetS risk among men but not among women.<sup>149</sup> Adherence to an n-3 fatty acid/fish dietary pattern showed a significant inverse association with MetS among Puerto Ricans living in the United States,<sup>150</sup> but other nutrients in fish might have influenced this effect. Also, consumption of lean fish at least 4 times per week reduced BP in coronary heart disease patients in a small 8-week RCT.<sup>151</sup> In The WISH-CARE RCT, which included 273 individuals with MetS, an 8-week dietary intervention (with 100 g/d of white fish compared with no fish or seafood) resulted in a

reduction of LDL-C, WC, and BP.<sup>152</sup> An 8-week pilot study in which fatty fish was consumed 4–5 times/week found decreases in potential mediators of lipid-induced insulin resistance and inflammation,<sup>153</sup> and it has been reported that fatty fish meals may be associated with improved glucose metabolism.<sup>154</sup> Moreover, fish oil consumption for 4 weeks improved lipid metabolism in individuals with MetS.<sup>155</sup> However, incorporating sardines daily in the diet of drug-naïve diabetic patients had no effect on glycemic control in a recent RCT.<sup>156</sup> Of interest, the protective effects of fish consumption against atherosclerosis might be partly explained by changes in HDL particles shifting their subclass distribution toward larger particles.<sup>157</sup> Fish oil was found to reduce blood glucose, insulinemia, and insulin resistance in women with MetS,<sup>158</sup> and such benefits may be seen even with short-term dietary supplementation.<sup>159</sup> Also, serum adiponectin levels increased after a sardine diet in patients with T2DM<sup>156</sup> and following fish oil supplementation in individuals with MetS,<sup>160</sup> although null findings on metabolic variables have also been reported.<sup>161,162</sup> On the other hand, results of the National Heart, Lung, and Blood Institute Family Heart Study do not support an association between dietary n-3 fatty acids and MetS.<sup>163</sup> A recent review<sup>164</sup> concludes that long-chain n-3 PUFAs play a role in limiting visceral adiposity and dyslipidemia, and possibly hypertension and inflammation, but the evidence on glucose homeostasis and insulin resistance is inconsistent.

Further studies are warranted to establish the ability of fish and long-chain n-3 fatty acid consumption to improve MetS and its components. Nevertheless, as reviewed,<sup>165</sup> there is little evidence that consumption of fish of any type or of long-chain n-3 PUFAs has a protective effect on the incidence of T2DM, which is a MetS component in lieu of hyperglycemia. Table 11 shows the grading of the evidence and recommendations regarding fish and n-3 fish oil consumption and MetS.

## Other dietary features that can influence metabolic syndrome

**Nuts and metabolic syndrome.** Nuts (tree nuts and peanuts) are high-energy, nutrient-dense seeds made of complex matrices that are rich in unsaturated fatty acids, fiber, nonsodium minerals, tocopherols, and bioactive phytochemicals such as polyphenols and phytosterols. Most of these components are bioavailable after consumption by humans and synergize to beneficially affect metabolic pathways, leading to protection from CVD and T2D.<sup>166</sup> Indeed, nut consumption has been consistently related to protection from fatal and nonfatal coronary heart disease, as shown in a recent meta-

**Table 11 Grading of the evidence and recommendations regarding intake of fish and n-3 fish oils and metabolic syndrome**

| Evidence and recommendation                                                                                                                           | Grade |
|-------------------------------------------------------------------------------------------------------------------------------------------------------|-------|
| <b>Evidence</b>                                                                                                                                       |       |
| Fish or n-3 fatty acid intake may reduce the risk of metabolic syndrome <sup>148–150,152</sup>                                                        | C     |
| <b>Recommendation</b>                                                                                                                                 |       |
| Eating a variety of fish at least twice a week, especially fish containing n-3, may be useful in preventing metabolic syndrome <sup>148–150,152</sup> | C     |

analysis of 6 prospective studies.<sup>167</sup> The same meta-analysis showed an inverse association between nut consumption and risk of incident T2DM, as derived from findings in 6 prospective studies.<sup>167</sup> The meta-analysis of 4 observational studies also showed a protective effect of nuts on hypertension.<sup>168</sup> Many RCTs have compared the effects of nut-enriched diets versus nut-free diets on the lipid profile. A pooled analysis of 25 clinical trials indicated a consistent cholesterol-lowering effect of nut-enriched diets, which was related to both nut dose and initial lipid levels, and nut diets also reduced TGs in individuals whose TG levels were elevated at baseline.<sup>169</sup> Although nuts are energy-dense foods, a previous meta-analysis of 31 RCTs showed small, nonsignificant associations of nut consumption with reduced, not increased, adiposity measures (body weight, BMI, and WC).<sup>170</sup> The fact that, besides reducing coronary heart disease risk, nut consumption has a favorable effect on T2DM, BP, and TGs and tends to be associated with reduced visceral adiposity, which are all MetS criteria, suggests that nuts might have a beneficial impact on MetS itself.

A recent meta-analysis of 49 RCTs examining nut consumption, which included a combined total of 2226 participants, reported beneficial effects on at least 1 criterion of MetS in the examined studies; the reported benefits included modest but significant decreases in TGs and fasting blood glucose and a tendency to lower WC, with no adverse effects on other criteria.<sup>171</sup> When evaluating the effect of nut consumption on MetS, data from 3 large epidemiologic studies were found that suggested a beneficial effect.<sup>172–174</sup> One cross-sectional assessment of the PREDIMED cohort of older persons at high CV risk showed that frequent nut eaters had a lower risk of MetS, as well as reduced risk of T2DM and abdominal obesity.<sup>172</sup> Similarly, nut consumption was related to a lower incidence of MetS in the prospective Seguimiento Universidad de Navarra cohort of Spanish university graduates<sup>173</sup> and to a lower prevalence of MetS in a cross-sectional report from the US National Health and Nutrition Examination Survey for 2001–2004.<sup>174</sup> One of the intervention arms in the PREDIMED trial was given advice on a MedDiet supplemented with 1 daily serving of mixed nuts. In a

**Table 12 Grading of the evidence and recommendations regarding nut intake and metabolic syndrome**

| Evidence and recommendation                                                                                                                                                         | Grade |
|-------------------------------------------------------------------------------------------------------------------------------------------------------------------------------------|-------|
| <b>Evidence</b>                                                                                                                                                                     |       |
| There is epidemiological and clinical trial evidence of a salutary effect of nut consumption on metabolic syndrome components and on the full syndrome itself <sup>76,172–174</sup> | B     |
| There is an added cardio-metabolic benefit from incorporating nuts into a Mediterranean-type dietary pattern <sup>166–169</sup>                                                     | A     |
| <b>Recommendation</b>                                                                                                                                                               |       |
| Consume 1 to 1.5 servings of nuts daily to reduce low-density lipoprotein cholesterol and cardiometabolic risk <sup>76,84,166–169,172–174</sup>                                     | A     |

preliminary report of the PREDIMED cohort after 1 year of intervention, the prevalence of MetS was reduced by 14% in the group receiving supplementary nuts, compared with 2% in the control diet group.<sup>84</sup> The recently published results of the full PREDIMED cohort after 4.8 years of follow-up show that participants with MetS at baseline (n = 3392) who were allocated to the MedDiet with nuts intervention arm had a 28% higher rate of MetS reversion compared with those in the control diet group, and this beneficial effect was driven mainly by reduced WC.<sup>76</sup> Of note, a similar beneficial effect was observed in the MedDiet enriched with extra-virgin olive oil intervention arm.

In summary, there is both epidemiological and RCT evidence of a salutary effect of nut consumption on MetS components and on the full syndrome. There is probably an added benefit if nuts are incorporated into a MedDiet. Table 12 shows the grading of the evidence and recommendations regarding nut consumption and MetS.

**Dairy products, eggs, and metabolic syndrome.** Several epidemiological studies have investigated the association between dairy product consumption and the risk of cardio-metabolic disease; however, little is known about the possible effects of eggs. Regarding dairy products, a review of 10 cross-sectional and 3 prospective studies suggested a protective effect of dairy product consumption on MetS, but the evidence was inconclusive.<sup>175</sup> Five other prospective studies published after this review have also demonstrated an inverse association between total dairy,<sup>176–178</sup> regular or reduced-fat dairy,<sup>179,180</sup> and MetS incidence. Only 1 prospective study has analyzed the associations between the type of dairy products consumed and MetS incidence in young adults,<sup>181</sup> showing an inverse association between an increased consumption of high-fat dairy products, reduced-fat dairy products, milk, or cheese and MetS

incidence. Similarly, in senior adults at high CV risk, higher consumption of low-fat dairy products, yogurt (total, low-fat, and whole-fat yogurt), and low-fat milk was associated with reduced risk of MetS; conversely, higher consumption of cheese was related to a higher risk of MetS.<sup>179</sup> The most recent meta-analysis on dairy consumption and MetS was published in 2016.<sup>182</sup> This meta-analysis, based on 9 prospective cohort studies, found that high dairy consumption was associated with a 15% reduction in MetS risk, as well as a reduction of 12% in MetS risk per 1-serving/day increment of dairy consumption. Overall, the majority of the literature suggests a benefit of dairy consumption on the risk of MetS, although the data remain somewhat inconclusive. Limitations of the epidemiologic studies that compound the results include the following: biases that were introduced from the failure to suitably control for confounding variables; limited information regarding dairy intake (including type of dairy product, quantity and fat content, synergistic effects with other foods, substituting effects, and whether it is fermented); and the use of different MetS diagnostic criteria.

Several studies have also explored the associations between dairy product consumption and MetS components. To date, 6 meta-analyses of observational studies have been published showing inverse associations between total or low-fat dairy consumption and diabetes incidence.<sup>183–188</sup> In 2 of these meta-analyses, an inverse association was also reported for yogurt and cheese consumption.<sup>184,185</sup> In a recent meta-analysis of prospective studies that included 3 large cohorts (Nurses Health Study I and II and Health Professionals Follow-up Study), yogurt consumption related inversely to diabetes incidence (18% lower risk of T2DM per 1 serving of yogurt).<sup>186</sup> After this meta-analysis, 2 other prospective studies have been published with similar results.<sup>189,190</sup> Finally, a more recent (2016) dose–response meta-analysis combined the results of 22 prospective studies, with a combined total of 579 832 individuals including 43 118 with T2DM, and showed a 3% and 4% lower risk of diabetes per 200 g/d of total and low-fat dairy products consumed, respectively.<sup>188</sup> This meta-analysis also showed a nonlinear inverse relationship between yogurt consumption and risk of T2DM, revealing a 14% lower risk when yogurt consumption was 80–125 g/d, compared with no intake of yogurt. However, cheese intake was not associated with the risk of T2DM. Only a few RCTs have examined the effect of dairy products on insulin resistance or pancreatic insulin secretion, and the results are contradictory.<sup>191</sup>

Regarding eggs and cardio-metabolic risk, a recent meta-analysis of prospective studies suggests that egg consumption is associated with an increased incidence of T2DM among the general population and of CVD

comorbidity among diabetic patients.<sup>192</sup> On the other hand, the results of 2 large prospective studies that examined the risk of T2DM derived from egg consumption suggest a neutral or even protective effect, particularly in men.<sup>193,194</sup> Thus, the role of eggs in the development of T2DM remains unclear.

Results of a systematic review of prospective studies suggested a protective effect of dairy product consumption on obesity; however, the effect was small.<sup>195</sup> In addition, an inverse association between the risk of overweight/obesity or weight gain and yogurt consumption was recently reported in 2 large cohort studies.<sup>196,197</sup> The effect of dairy consumption on weight and body composition was further investigated in 2 meta-analyses of RCTs. The first meta-analysis of 14 RCTs found that increasing dairy consumption to recommended daily intakes in adults who do not follow any calorie-restricted diet had a small effect on weight loss but also resulted in decreased fat mass and WC.<sup>198</sup> The second meta-analysis of 29 RCTs found that overall consumption of dairy products did not result in a significant reduction in weight; however, a subgroup analysis showed that consumption of dairy products in the context of energy restriction did reduce body weight.<sup>199</sup> Regarding the BP component of MetS, consumption of milk and dairy products has been inversely related to the risk of hypertension,<sup>200</sup> and some intervention studies have shown a BP-lowering effect of milk-derived peptides.<sup>201,202</sup> Contradictory results of prospective studies or RCTs have been reported in relation to the other components of MetS (ie, TGs or HDL-C levels).

Although more studies are warranted to clarify the metabolic effects of dairy consumption, some evidence suggests that many dairy components may contribute to beneficial effects on MetS.<sup>191,203</sup> For example, some studies have demonstrated that dairy calcium reduces gut fatty acid bioavailability,<sup>204</sup> increases lipogenesis through effects on intracellular calcium,<sup>205</sup> decreases BP, and increases insulin sensitivity. Besides a BP-lowering effect,<sup>202</sup> some peptides present in dairy products have also been shown to increase satiety through the modulation of gastrointestinal hormones.<sup>206,207</sup> Medium-chain fatty acids from milk improve insulin sensitivity and potentially have beneficial effects on weight.<sup>208</sup> The possibility that dairy-derived trans-palmitoleic acid has metabolic bioactivities has also been proposed.<sup>191</sup> Fermented products and some probiotic bacteria have also improved MetS components through different mechanisms.<sup>191,203</sup>

In summary, there is no evidence to support the existing public health advice to limit consumption of dairy products to prevent MetS. Cheese and other dairy products are, in fact, nutrient-dense foods that can give pleasure in daily meals. More high-quality research is needed to identify the role of eggs in the development



**Table 13 Grading of the evidence and recommendations regarding dairy product and egg intake and metabolic syndrome**

| Evidence and recommendation                                                                                                                           | Grade |
|-------------------------------------------------------------------------------------------------------------------------------------------------------|-------|
| <b>Evidence</b>                                                                                                                                       |       |
| There is no evidence to support the existing public health advice to limit consumption of dairy products to prevent metabolic syndrome <sup>182</sup> | B     |
| There is no evidence to limit eggs intake to prevent metabolic syndrome <sup>193,194</sup>                                                            | C     |
| <b>Recommendation</b>                                                                                                                                 |       |
| Dairy products and particularly yogurt consumption may be useful in preventing metabolic syndrome <sup>179,182,188</sup>                              | B     |

of T2DM. Table 13 shows the grading of the evidence and recommendations regarding dairy product and egg consumption and MetS.

### SWEETS, SUGAR-SWEETENED BEVERAGES, AND ARTIFICIAL SWEETENERS

Sugars, including disaccharides (sucrose) and monosaccharides (glucose, fructose), are major ingredients of processed foods.<sup>209</sup> Global intake of sugars is increasing as traditional diets are being replaced by Western diets high in processed foods.<sup>210</sup> Sugars provide energy that, if not balanced by energy expenditure from physical activity, will lead to weight gain. Adiposity is causally linked to insulin resistance, T2DM, dyslipidemia, and high BP, which are components of MetS.<sup>211</sup> A high intake of sugars will also increase blood glucose and insulin secretion independent of total energy intake. In this situation, insulin hypersecretion may lead to insulin resistance, T2DM, and diabetic dyslipidemia (high TGs, low HDL-C).<sup>211</sup>

Sugar-sweetened beverages (SSBs) are responsible for a large proportion of total sugar and energy intake in both developed and developing countries.<sup>212</sup> Sugar-sweetened beverages are also unique in that they are not as satiating as solid foods, which could lead to overconsumption of energy.<sup>213,214</sup> In meta-analyses of long-term prospective cohort studies and short-term RCTs, intakes of total sugars or SSBs are associated with weight gain or higher BMI<sup>215–218</sup> and greater risk of T2DM,<sup>219–221</sup> dyslipidemia,<sup>222</sup> and high BP.<sup>222–224</sup> Among the different sugars consumed, fructose has been singled out because it stimulates *de novo* lipogenesis, hypertriglyceridemia, visceral adipogenesis, and insulin resistance.<sup>225,226</sup> However, recent meta-analyses of controlled feeding studies suggest that fructose produces similar effects as other sugars except when fructose provides excess energy (increased weight gain, lipids) or among diabetic patients (poorer glycemic control).<sup>227–231</sup>

**Table 14 Grading of the evidence and recommendations regarding sweets, sugar-sweetened beverages, and artificial sweetener intake and metabolic syndrome**

| Evidence and recommendation                                                                                                                                                                                                                               | Grade |
|-----------------------------------------------------------------------------------------------------------------------------------------------------------------------------------------------------------------------------------------------------------|-------|
| <b>Evidence</b>                                                                                                                                                                                                                                           |       |
| Meta-analyses of long-term prospective cohort studies and short-term randomized controlled trials indicate that total sugars or sugar-sweetened beverages are associated with a greater risk of metabolic syndrome and type 2 diabetes <sup>219–221</sup> | A     |
| <b>Recommendation</b>                                                                                                                                                                                                                                     |       |
| Reduce intake of sugar-sweetened beverages <sup>240</sup>                                                                                                                                                                                                 | B     |
| Replace sugar-sweetened beverages with artificially sweetened beverages <sup>238,236</sup>                                                                                                                                                                | C     |
| Reduce intake of fructose versus other sugars <sup>230,231</sup>                                                                                                                                                                                          | C     |

The role of artificial sweeteners on cardio-metabolic health is an issue of great interest, with studies focusing almost exclusively on diet soda intake. Findings from prospective cohort studies have been heterogeneous,<sup>232</sup> including inverse,<sup>197</sup> null,<sup>233,234</sup> or direct<sup>219,221,223,235</sup> associations with MetS components. However, many studies were likely contaminated by individuals consuming artificially sweetened beverages in an effort to lose weight, prevent weight gain, or in response to a disease diagnosis—all of which could bias associations.<sup>234,236,237</sup> In 2 major RCTs in children, substituting SSBs for artificially sweetened beverages reduced weight gain and fat accumulation.<sup>238,239</sup>

In summary, although few long-term RCTs of sugar intake have been performed to verify the results of prospective cohort studies and short-term trials, the overall evidence suggests a reduction of dietary sugars and, in particular, SSBs protects against the development of MetS.<sup>240</sup> Table 14 shows the grading of the evidence and recommendations regarding consumption of sweets, SSBs, and artificial sweeteners and MetS.

### FUNCTIONAL FOODS—BIOACTIVES FOR TREATING METABOLIC SYNDROME

In addition to the time-honored dietary therapy, several single nutrients, bioactives, and “functional foods” could improve aspects of MetS. The Office of Dietary Supplements at the National Institutes of Health in the United States has defined bioactive compounds as constituents in foods or dietary supplements, other than those needed to meet basic human nutritional needs, that are responsible for changes in health status.

Although the mode of action of various functional foods differ, many share a common mechanistic principle. Glucose uptake in liver, muscle, and adipose tissue is inhibited due to insulin resistance, muscle metabolic flexibility decreases, hepatic lipid handling is “blunted,” and

vascular flexibility decreases, resulting in loss of cholesterol homeostasis and inflammatory control. Actually, MetS is characterized by a systemic loss of flexibility (phenotypic flexibility).<sup>241</sup> The mode of action of many bioactive nutritional compounds potentially effective against MetS is related to restoring or optimizing these mechanisms. Again, under maintained metabolic stress, these compounds will perform better than many pharmacological strategies that are directed at MetS manifestations but that do not restore flexibility or sensitivity.<sup>242</sup> Also, these compounds may be used in a personalized manner as, within the spectrum of MetS, many different subtypes and subgroups manifest. Often apparently conflicting results were observed between studies in meta-analyses, suggesting that confounding factors (eg, choice of study population, type of diet) influence the results. Finally, many studies show temporal effects, suggesting compensatory mechanisms. Taken together, this suggests that (1) whole food/dietary interventions that contain high amounts of multiple classes of food bioactives and also address caloric imbalance are more effective and preferred above strategies involving single bioactives, and (2) single-bioactive strategies may be especially effective for specific MetS components.

A well-known example of a food bioactive demonstrating an effect on a MetS component is salt (sodium) in relation to BP, where genetic polymorphisms codetermine the efficacy.<sup>243,244</sup> Given the association between high sodium intake and elevated BP,<sup>245</sup> salt reduction could decrease BP in patients with MetS. A reduced intake of sodium may be particularly beneficial in individuals with MetS because both obesity and insulin resistance relate to salt sensitivity.<sup>246</sup> Other factors affecting the correlation of salt sensitivity with BP are advanced age, black race, diabetes, and chronic kidney disease.<sup>247</sup> Both a healthy dietary pattern, as exemplified by the DASH diet, and reduced sodium intake independently reduce BP.<sup>112</sup> However, the BP-lowering effect is even greater when these dietary changes are combined. Carnitine facilitates fatty acid oxidation and, as such, was shown to be effective in reducing fatty liver, a feature of MetS.<sup>248,249</sup> Similarly, choline, as a precursor for phosphatidylcholine, is essential for hepatic very-low-density lipoprotein synthesis and, thus, could be beneficial for the hypertriglyceridemia component of MetS.<sup>250,251</sup>

### INFLUENCE OF CHRONOBIOLOGY ON METABOLIC SYNDROME

Several health concerns have emerged in modern society, including (1) an increase in the incidence of obesity and MetS and (2) a progressive loss of sleep associated with an increase in the incidence of chronodisruption. The term chronodisruption refers to the desynchronization of 24-hour rhythms with adverse health effects.<sup>252</sup>

Human chronodisruption may be a consequence of nocturnal feeding, excessive exposure to light at night, or instability of exposure to environmental synchronizers, among other factors.<sup>253</sup> Clinical and epidemiological studies over the last few years coupled with a large body of evidence have shown the interaction between the circadian system and different MetS components such as impairment of carbohydrate and lipid metabolism, adipose tissue function, and heart, vascular and hemostatic function.<sup>253</sup> Moreover, epidemiological studies show that shift work is associated with obesity, hypertriglyceridemia, low HDL-C, abdominal obesity, T2DM, and CVD.<sup>254</sup> Experiments performed in animal models and in tissue culture<sup>255,256</sup> are contributing to a deeper knowledge of the relationship between chronobiology and MetS.<sup>257</sup>

Although there is an effect of the endogenous circadian clock on multiple human metabolic pathways,<sup>258</sup> modifications of sleep or other external synchronizers of the internal clock, such as light intensity, and changes from fasting to eating and from resting to activity may alter the circadian system. In principle, whatever allows the establishment of temporal organizational order should also be capable of disrupting such order when present or applied in excess or deficit and, most importantly, at unusual and inappropriate times. Several studies performed in experimental animals have demonstrated that when animals eat at the “wrong time” they become obese.<sup>259</sup> Moreover, a recent randomized, crossover clinical study has demonstrated that eating late is associated with several metabolic alterations.<sup>260</sup> Sleep is not a clear “output” of our internal clock. However, it is modifiable by the subject and, because it can also change the individual exposure to the external synchronizers such as light, it is able to influence the internal clock function.<sup>261</sup> Other factors such as inadequate hours of physical activity may also alter the circadian system. Indeed, physical activity acts as an “input” of the circadian timing system.<sup>262</sup> Studies have suggested that scheduled physical activity can alter circadian rhythms<sup>263</sup>; for example, physical activity performed in the late evening might not be as beneficial as in the morning.<sup>262</sup> Table 15 shows the grading of the evidence and recommendations regarding chronobiology and MetS.

### SUMMARY OF LIFESTYLE MEASURES AND HEALTHY FOOD CHOICES FOR MANAGING METABOLIC SYNDROME

Lifestyle interventions are the initial strategies for the prevention and treatment of MetS. In this report, the available scientific evidence on the associations between lifestyle changes and MetS and its components are identified (Box 2 and Table 16) with the goal of deriving

**Table 15 Grading of the evidence and recommendations regarding chronobiology and metabolic syndrome**

| Evidence and recommendation                                                                                                                                 | Grade |
|-------------------------------------------------------------------------------------------------------------------------------------------------------------|-------|
| <b>Evidence</b>                                                                                                                                             |       |
| Shift workers face potential health problems.                                                                                                               | B     |
| Overall, those who work night or rotating shifts seem to have a higher risk of insulin resistance, metabolic syndrome, and heart disease <sup>254,257</sup> |       |
| <b>Recommendation</b>                                                                                                                                       |       |
| Avoid intense light exposition during night time and sleep in total darkness when possible <sup>261</sup>                                                   | B     |
| Eat the main meal of the day before 3 PM <sup>260</sup>                                                                                                     | B     |

**Box 2 Lifestyle recommendations for management of metabolic syndrome**

- Smoking cessation
- 30–60 min of daily physical activity
- For overweight and obese patients with metabolic syndrome: a doctor-prescribed healthy diet designed to achieve 5% weight loss
- Plant-based Mediterranean diet, with or without energy restriction, Dietary Approaches to Stop Hypertension diet, or vegetarian diet as a component of the treatment strategy
- Specific dietary recommendations include:
  - Limit saturated and trans fats and increase dietary fiber
  - Reduce intake of sugar-sweetened beverages
  - Moderate alcohol intake
  - Restrict salt intake

recommendations for the prevention and management of MetS. In overweight or obese individuals, weight loss through calorie restriction and increased physical activity, which must be individualized based on fitness level and comorbidities, is essential for preventing MetS or treating the condition when present. Regarding the dietary approach to prevention and treatment, over the last decade, research in nutritional epidemiology has moved from the single food approach to the dietary pattern strategy, which better reflects the complexity of interactive effects of multiple nutrients on health status.<sup>264,265</sup> A MedDiet pattern, with or without energy restriction, can be recommended for all people with MetS as an effective component of the treatment strategy. This dietary pattern should be built upon an increased consumption of unsaturated fat, primarily from olive oil (range of 20–40 g/d), and should emphasize the consumption of a variety of legumes, cereals (whole grains), fruits, vegetables, fish, nuts, and dairy products, as well as a moderate consumption of alcohol (red wine and/or beer). Indeed, in isolation and independent of the background diet, increased consumption of all of the abundant foods in the MedDiet has shown a beneficial effect on MetS components. Other dietary patterns (DASH,

**Table 16 Foods, nutrients, and dietary patterns in the prevention of metabolic syndrome**

| Dietary component       | Unfavorable                                                              | Favorable                                                                                                                                                  |
|-------------------------|--------------------------------------------------------------------------|------------------------------------------------------------------------------------------------------------------------------------------------------------|
| <b>Foods</b>            | Sugar-sweetened beverages<br>Meat products<br>Excessive alcoholic intake | Fruits and vegetables<br>Legumes and cereals (whole grains)<br>Moderate intake of red wine and beer<br>Olive oil<br>Fish<br>Nuts<br>Low-fat dairy products |
| <b>Nutrients</b>        | Sucrose, fructose<br>Salt<br>Saturated fatty acids<br>Trans fatty acids  | Fiber<br>Unsaturated fatty acids<br>Bioactives: carnitine and choline                                                                                      |
| <b>Dietary patterns</b> | Western diet                                                             | Mediterranean diet, Dietary Approaches to Stop Hypertension diet, new Nordic diet, vegetarian diets                                                        |

new Nordic, and vegetarian diets) have also been proposed as alternatives to the MedDiet for preventing MetS. Quitting smoking and reducing intake of sugar-sweetened beverages and meat and meat products are mandatory to prevent and treat MetS. Advances in the field of chronobiology and nutrigenetics are expected to open new paths in the realm of customized diets for MetS prevention.<sup>266</sup> The inconsistencies and gaps in evidence described here suggest that additional research is needed to refine the most appropriate therapies for MetS.

## CONCLUSION

A healthy lifestyle is critical to prevent or delay the onset of MetS in susceptible individuals and to prevent CVD and T2DM in those with MetS. The recommendations presented here should help patients and clinicians understand and implement the most effective approaches for lifestyle change to prevent MetS and improve cardio-metabolic health.

## Acknowledgments

CIBEROBN (CIBER Fisiopatología Obesidad y Nutrición) and CIBERESP (CIBER Epidemiología y salud pública) is an initiative of Instituto de Salud Carlos III, Spain.

**Funding/support.** No external funding was received for this work.

**Declaration of interest.** P.P.M., D.P.M., V.G.A., M.B., P.C., M.I.C., L.K., J.D.L., A.D.L., C.A.D., R.E., K.E., M.F., M.G., D.G., A.G.R., N.K., G.K., B.L., M.I.M., G.M.S., A.M.G.,

D.N., J.M.O., F.P.J., M.R., J.S.S., H.S., F.J.T., R.T., B.V.O., S.W., and J.L.M. have no relevant interests to declare. E.R. has received grants for research through his institution from the California Walnut Commission and is a non-paid member of its Scientific Advisory Board. B.L. has received funding from the Canadian Institutes of Health Research, Natural Sciences and Engineering Research Council of Canada, Agriculture and AgriFood Canada, the Canola Council of Canada, Dairy Farmers of Canada, Dairy Research Institute, Atrium Innovations, the Danone Institute, and Merck Frosst.

## REFERENCES

- Minich DM, Bland JS. Dietary management of the metabolic syndrome beyond macronutrients. *Nutr Rev*. 2008;66:429–444.
- Abete I, Astrup A, Martinez JA, et al. Obesity and the metabolic syndrome: role of different dietary macronutrient distribution patterns and specific nutritional components on weight loss and maintenance. *Nutr Rev*. 2010;68:214–231.
- Keane D, Kelly S, Healy NP, et al. Diet and metabolic syndrome: an overview. *Curr Vasc Pharmacol*. 2013;11:842–857.
- Expert Panel on Detection, Evaluation, and Treatment of High Blood Cholesterol in Adults. Executive summary of the third report of the National Cholesterol Education Program (NCEP) Expert Panel on Detection, Evaluation, and Treatment of High Blood Cholesterol in Adults (Adult Treatment Panel III). *JAMA*. 2001;285:2486–2497.
- Alberti KG, Zimmet P, Shaw J, Group IDFETFC. The metabolic syndrome—a new worldwide definition. *Lancet*. 2005;366:1059–1062.
- Kahn R, Buse J, Ferrannini E, Stern M. The metabolic syndrome: time for a critical appraisal. Joint statement from the American Diabetes Association and the European Association for the Study of Diabetes. *Diabetologia*. 2005;48:1684–1699.
- Simmons RK, Alberti KG, Gale EA, et al. The metabolic syndrome: useful concept or clinical tool? Report of a WHO expert consultation. *Diabetologia*. 2010;53:600–605.
- Grundy SM, Cleeman JI, Daniels SR, et al. Diagnosis and management of the metabolic syndrome: an American Heart Association/National Heart, Lung, and Blood Institute Scientific Statement. *Circulation*. 2005;112:2735–2752.
- Alberti KG, Eckel RH, Grundy SM, et al. Harmonizing the metabolic syndrome: a joint interim statement of the International Diabetes Federation Task Force on Epidemiology and Prevention; National Heart, Lung, and Blood Institute; American Heart Association; World Heart Federation; International Atherosclerosis Society; and International Association for the Study of Obesity. *Circulation*. 2009;120:1640–1645.
- Beltran-Sanchez H, Harhay MO, Harhay MM, et al. Prevalence and trends of metabolic syndrome in the adult U.S. population, 1999–2010. *J Am Coll Cardiol*. 2013;62:697–703.
- Knott CS, Coombs N, Stamatakis E, et al. All cause mortality and the case for age specific alcohol consumption guidelines: pooled analyses of up to 10 population based cohorts. *BMJ*. 2015;350:h384.
- Corrao G, Rubbiati L, Bagnardi V, et al. Alcohol and coronary heart disease: a meta-analysis. *Addiction*. 2000;95:1505–1523.
- Slagter SN, van Vliet-Ostapchouk JV, Vonk JM, et al. Combined effects of smoking and alcohol on metabolic syndrome: the LifeLines cohort study. *PLoS One*. 2014;9:e96406.
- Ellison RC, Zhang Y, Qureshi MM, et al. Lifestyle determinants of high-density lipoprotein cholesterol: the National Heart, Lung, and Blood Institute Family Heart Study. *Am Heart J*. 2004;147:529–535.
- Schroder H, Morales-Molina JA, Bermejo S, et al. Relationship of abdominal obesity with alcohol consumption at population scale. *Eur J Nutr*. 2007;46:369–376.
- Whitfield JB, Heath AC, Madden PA, et al. Metabolic and biochemical effects of low-to-moderate alcohol consumption. *Alcohol Clin Exp Res*. 2013;37:575–586.
- Taylor B, Irving HM, Baliunas D, et al. Alcohol and hypertension: gender differences in dose-response relationships determined through systematic review and meta-analysis. *Addiction*. 2009;104:1981–1990.
- Koppes LL, Dekker JM, Hendriks HF, et al. Moderate alcohol consumption lowers the risk of type 2 diabetes: a meta-analysis of prospective observational studies. *Diabetes Care*. 2005;28:719–725.
- Alkerwi A, Boutsen M, Vaillant M, et al. Alcohol consumption and the prevalence of metabolic syndrome: a meta-analysis of observational studies. *Atherosclerosis*. 2009;204:624–635.
- Freiberg MS, Cabral HJ, Heeren TC, et al. Alcohol consumption and the prevalence of the Metabolic Syndrome in the US: a cross-sectional analysis of data from the Third National Health and Nutrition Examination Survey. *Diabetes Care*. 2004;27:2954–2959.
- Barrio-Lopez MT, Bes-Rastrollo M, Sayon-Orea C, et al. Different types of alcoholic beverages and incidence of metabolic syndrome and its components in a Mediterranean cohort. *Clin Nutr*. 2013;32:797–804.
- Tresserra-Rimbau A, Medina-Ramon A, Lamuela-Raventos RM, et al. Moderate red wine consumption is associated with a lower prevalence of the metabolic syndrome in the PREDIMED population. *Br J Nutr*. 2015;113(suppl 2):S121–S130.
- Chiva-Blanch G, Urpi-Sarda M, Ros E, et al. Effects of red wine polyphenols and alcohol on glucose metabolism and the lipid profile: a randomized clinical trial. *Clin Nutr*. 2013;32:200–206.
- Chiva-Blanch G, Urpi-Sarda M, Ros E, et al. Dealccoholized red wine decreases systolic and diastolic blood pressure and increases plasma nitric oxide: short communication. *Circ Res*. 2012;111:1065–1068.
- Covas MI, Nyyssonen K, Poulsen HE, et al. The effect of polyphenols in olive oil on heart disease risk factors: a randomized trial. *Ann Intern Med*. 2006;145:333–341.
- Wilsaard T, Jacobsen BK. Lifestyle factors and incident metabolic syndrome. The Tromso Study 1979–2001. *Diabetes Res Clin Pract*. 2007;78:217–224.
- Fumeron F, Lamri A, Emery N, et al. Dairy products and the metabolic syndrome in a prospective study, DESIR. *J Am Coll Nutr*. 2011;30(suppl 1):454S–463S.
- Pfeuffer M, Auringer A, Bley U, et al. Effect of quercetin on traits of the metabolic syndrome, endothelial function and inflammation in men with different APOE isoforms. *Nutr Metab Cardiovasc Dis*. 2013;23:403–409.
- Gepner Y, Golan R, Harman-Boehm I, et al. Effects of initiating moderate alcohol intake on cardiometabolic risk in adults with type 2 diabetes: a 2-year randomized, controlled trial. *Ann Intern Med*. 2015;163:569–579.
- Sun K, Liu J, Ning G. Active smoking and risk of metabolic syndrome: a meta-analysis of prospective studies. *PLoS One*. 2012;7:e47791.
- Slagter SN, van Vliet-Ostapchouk JV, Vonk JM, et al. Associations between smoking, components of metabolic syndrome and lipoprotein particle size. *BMC Med*. 2013;11:195.
- Hwang GY, Cho YJ, Chung RH, Kim SH. The relationship between smoking level and metabolic syndrome in male health check-up examinees over 40 years of age. *Korean J Fam Med*. 2014;35:219–226.
- Berlin I, Lin S, Lima JA, et al. Smoking status and metabolic syndrome in the multi-ethnic study of atherosclerosis. A cross-sectional study. *Tob Induc Dis*. 2012;10:9.
- Carnethon MR, Loria CM, Hill JO, et al. Risk factors for the metabolic syndrome: the Coronary Artery Risk Development in Young Adults (CARDIA) study, 1985–2001. *Diabetes Care*. 2004;27:2707–2715.
- Audrain-McGovern J, Benowitz NL. Cigarette smoking, nicotine, and body weight. *Clin Pharmacol Ther*. 2011;90:164–168.
- Ridker PM, Buring JE, Cook NR, et al. C-reactive protein, the metabolic syndrome, and risk of incident cardiovascular events: an 8-year follow-up of 14 719 initially healthy American women. *Circulation*. 2003;107:391–397.
- Wakabayashi I. Associations of alcohol drinking and cigarette smoking with serum lipid levels in healthy middle-aged men. *Alcohol Alcohol*. 2008;43:274–280.
- Wada T, Urashima M, Fukumoto T. Risk of metabolic syndrome persists twenty years after the cessation of smoking. *Intern Med*. 2007;46:1079–1082.
- Calo WA, Ortiz AP, Suarez E, et al. Association of cigarette smoking and metabolic syndrome in a Puerto Rican adult population. *J Immigr Minor Health*. 2013;15:810–816.
- Kim BJ, Kim BS, Sung KC, et al. Association of smoking status, weight change, and incident metabolic syndrome in men: a 3-year follow-up study. *Diabetes Care*. 2009;32:1314–1316.
- de Oliveira Fontes Gasperin L, Neuberger M, Tichy A, et al. Cross-sectional association between cigarette smoking and abdominal obesity among Austrian bank employees. *BMJ Open*. 2014;4:e004899.
- Pan A, Wang Y, Talaei M, et al. Relation of active, passive, and quitting smoking with incident type 2 diabetes: a systematic review and meta-analysis. *Lancet Diabetes Endocrinol*. 2015;3:958–967.
- Sattar N, Sorensen T, Taylor AE, et al. Smoking and diabetes risk: building a causal case with clinical implications. *Lancet Diabetes Endocrinol*. 2015;3:918–920.
- Tian J, Venn A, Otahal P, et al. The association between quitting smoking and weight gain: a systemic review and meta-analysis of prospective cohort studies. *Obes Rev*. 2015;16:883–901.
- Aubin HJ, Farley A, Lycett D, et al. Weight gain in smokers after quitting cigarettes: meta-analysis. *BMJ*. 2012;345:e4439.
- World Health Organization. Global health risks: mortality and burden of disease attributable to selected major risks 2009. Geneva, Switzerland: WHO Press; 2009.
- Warburton DE, Nicol CW, Bredin SS. Health benefits of physical activity: the evidence. *CMAJ*. 2006;174:801–809.
- Despres JP, Lemieux I, Bergeron J, et al. Abdominal obesity and the metabolic syndrome: contribution to global cardiometabolic risk. *Arterioscler Thromb Vasc Biol*. 2008;28:1039–1049.



49. Janiszewski PM, Ross R. The utility of physical activity in the management of global cardiometabolic risk. *Obesity* (Silver Spring). 2009;17(suppl 3):S3–S14.
50. Misra A, Alappan NK, Vikram NK, et al. Effect of supervised progressive resistance-exercise training protocol on insulin sensitivity, glycemia, lipids, and body composition in Asian Indians with type 2 diabetes. *Diabetes Care*. 2008;31:1282–1287.
51. Ilanne-Parikka P, Laaksonen DE, Eriksson JG, et al. Leisure-time physical activity and the metabolic syndrome in the Finnish diabetes prevention study. *Diabetes Care*. 2010;33:1610–1617.
52. He D, Xi B, Xue J, et al. Association between leisure time physical activity and metabolic syndrome: a meta-analysis of prospective cohort studies. *Endocrine*. 2014;46:231–240.
53. Conceicao MS, Bonganha V, Vechin FC, et al. Sixteen weeks of resistance training can decrease the risk of metabolic syndrome in healthy postmenopausal women. *Clin Interv Aging*. 2013;8:1221–1228.
54. Ekelund U, Ward HA, Norat T, et al. Physical activity and all-cause mortality across levels of overall and abdominal adiposity in European men and women: the European Prospective Investigation into Cancer and Nutrition Study (EPIC). *Am J Clin Nutr*. 2015;101:613–621.
55. Aadahl M, Kjaer M, Jorgensen T. Influence of time spent on TV viewing and vigorous intensity physical activity on cardiovascular biomarkers. The Inter 99 study. *Eur J Cardiovasc Prev Rehabil*. 2007;14:660–665.
56. Thorp AA, Healy GN, Owen N, et al. Deleterious associations of sitting time and television viewing time with cardiometabolic risk biomarkers: Australian Diabetes, Obesity and Lifestyle (AusDiab) study 2004–2005. *Diabetes Care*. 2010;33:327–334.
57. Misra A, Chowbey P, Makkar BM, et al. Consensus statement for diagnosis of obesity, abdominal obesity and the metabolic syndrome for Asian Indians and recommendations for physical activity, medical and surgical management. *J Assoc Physicians India*. 2009;57:163–170.
58. US Department of Health and Human Services. 2008 Physical Activity Guidelines for Americans. 2008. <http://www.health.gov/PAGuidelines>. Accessed October 26, 2016.
59. Li Y, Lee S, Langley T, et al. Subsarcolemmal lipid droplet responses to a combined endurance and strength exercise intervention. *Physiol Rep*. 2014;2:e12187.
60. Katsiki N, Athyros VG, Karagiannis A, et al. Metabolic syndrome and non-cardiac vascular diseases: an update from human studies. *Curr Pharm Des*. 2014;20:4944–4952.
61. Teixeira TF, Alves RD, Moreira AP, et al. Main characteristics of metabolically obese normal weight and metabolically healthy obese phenotypes. *Nutr Rev*. 2015;73:175–190.
62. Rabkin SW. The relationship between epicardial fat and indices of obesity and the metabolic syndrome: a systematic review and meta-analysis. *Metab Syndr Relat Disord*. 2014;12:31–42.
63. Katsiki N, Athyros VG, Karagiannis A, et al. Characteristics other than the diagnostic criteria associated with metabolic syndrome: an overview. *Curr Vasc Pharmacol*. 2014;12:627–641.
64. Lioudaki E, Vrentzos GE, Mavrogeni H, et al. Prevalence of metabolic syndrome according to different definitions in a hypertensive population. *Angiology*. 2012;63:39–47.
65. Athyros VG, Ganotakis ES, Tziomalos K, et al. Comparison of four definitions of the metabolic syndrome in a Greek (Mediterranean) population. *Curr Med Res Opin*. 2010;26:713–719.
66. Tobias DK, Chen M, Manson JE, et al. Effect of low-fat diet interventions versus other diet interventions on long-term weight change in adults: a systematic review and meta-analysis. *Lancet Diabetes Endocrinol*. 2015;3:968–979.
67. Steffen LM, Van Horn L, Davi GL, et al. A modified Mediterranean diet score is associated with a lower risk of incident metabolic syndrome over 25 years among young adults: the CARDIA (Coronary Artery Risk Development in Young Adults) study. *Br J Nutr*. 2014;112:1654–1661.
68. Pucci A, Finer N. New medications for treatment of obesity: metabolic and cardiovascular effects. *Can J Cardiol*. 2015;31:142–152.
69. Gloy VL, Briel M, Bhatt DL, et al. Bariatric surgery versus non-surgical treatment for obesity: a systematic review and meta-analysis of randomised controlled trials. *BMJ*. 2013;347:f934.
70. Valenta I, Dilsizian V, Quercioli A, et al. Impact of obesity and bariatric surgery on metabolism and coronary circulation function. *Curr Cardiol Rep*. 2014;16:433.
71. Athyros VG, Ganotakis E, Kolovou GD, et al. Assessing the treatment effect in metabolic syndrome without perceptible diabetes (ATTEMPT): a prospective-randomized study in middle aged men and women. *Curr Vasc Pharmacol*. 2011;9:647–657.
72. Bach-Faig A, Berry EM, Lairon D, et al. Mediterranean diet pyramid today. Science and cultural updates. *Public Health Nutr*. 2011;14(12A):2274–2284.
73. Martinez-Gonzalez MA, Salas-Salvado J, Estruch R, et al. Benefits of the Mediterranean diet: insights from the PREDIMED Study. *Prog Cardiovasc Dis*. 2015;58:50–60.
74. Mozaffarian D, Ludwig DS. The 2015 US Dietary Guidelines: lifting the ban on total dietary fat. *JAMA*. 2015;313:2421–2422.
75. Esposito K, Marfella R, Ciotola M, et al. Effect of a Mediterranean-style diet on endothelial dysfunction and markers of vascular inflammation in the metabolic syndrome: a randomized trial. *JAMA*. 2004;292:1440–1446.
76. Babio N, Toledo E, Estruch R, et al. Mediterranean diets and metabolic syndrome status in the PREDIMED randomized trial. *CMAJ*. 2014;186:E649–657.
77. Tortosa A, Bes-Rastrollo M, Sanchez-Villegas A, et al. Mediterranean diet inversely associated with the incidence of metabolic syndrome: the SUN prospective cohort. *Diabetes Care*. 2007;30:2957–2959.
78. Meydani M. A Mediterranean-style diet and metabolic syndrome. *Nutr Rev*. 2005;63:312–314.
79. Kastorini CM, Milionis HJ, Esposito K, et al. The effect of Mediterranean diet on metabolic syndrome and its components: a meta-analysis of 50 studies and 534,906 individuals. *J Am Coll Cardiol*. 2011;57:1299–1313.
80. Perez-Martinez P, Garcia-Rios A, Delgado-Lista J, et al. Mediterranean diet rich in olive oil and obesity, metabolic syndrome and diabetes mellitus. *Curr Pharm Des*. 2011;17:769–777.
81. Maiorino MI, Bellastella G, Esposito K. Diabetes and sexual dysfunction: current perspectives. *Diabetes Metab Syndr Obes*. 2014;7:95–105.
82. Esposito K, Ceriello A, Giugliano D. Diet and the metabolic syndrome. *Metab Syndr Relat Disord*. 2007;5:291–296.
83. Esposito K, Ciotola M, Maiorino MI, et al. Lifestyle approach for type 2 diabetes and metabolic syndrome. *Curr Atheroscler Rep*. 2008;10:523–528.
84. Salas-Salvado J, Fernandez-Ballart J, Ros E, et al. Effect of a Mediterranean diet supplemented with nuts on metabolic syndrome status: one-year results of the PREDIMED randomized trial. *Arch Intern Med*. 2008;168:2449–2458.
85. Covas MI, de la Torre R, Fito M. Virgin olive oil: a key food for cardiovascular risk protection. *Br J Nutr*. 2015;113(suppl 2):S19–S28.
86. Misra A, Singhal N, Khurana L. Obesity, the metabolic syndrome, and type 2 diabetes in developing countries: role of dietary fats and oils. *J Am Coll Nutr*. 2010;29(suppl 3):289S–301S.
87. Gillingham LG, Harris-Janz S, Jones PJ. Dietary monounsaturated fatty acids are protective against metabolic syndrome and cardiovascular disease risk factors. *Lipids*. 2011;46:209–228.
88. Lopez-Miranda J, Perez-Jimenez F, Ros E, et al. Olive oil and health: summary of the II international conference on olive oil and health consensus report, Jaen and Cordoba (Spain) 2008. *Nutr Metab Cardiovasc Dis*. 2010;20:284–294.
89. Ferrara LA, Raimondi AS, d'Episcopo L, et al. Olive oil and reduced need for anti-hypertensive medications. *Arch Intern Med*. 2000;160:837–842.
90. Bondia-Pons I, Schroder H, Covas MI, et al. Moderate consumption of olive oil by healthy European men reduces systolic blood pressure in non-Mediterranean participants. *J Nutr*. 2007;137:84–87.
91. Nigam P, Bhatt S, Misra A, et al. Effect of a 6-month intervention with cooking oils containing a high concentration of monounsaturated fatty acids (olive and canola oils) compared with control oil in male Asian Indians with nonalcoholic fatty liver disease. *Diabetes Technol Ther*. 2014;16:255–261.
92. Grundy SM, Brewer HB Jr, Cleeman JJ, et al. Definition of metabolic syndrome: report of the National Heart, Lung, and Blood Institute/American Heart Association conference on scientific issues related to definition. *Circulation*. 2004;109:433–438.
93. Yubero-Serrano EM, Delgado-Lista J, Pena-Orihuela P, et al. Oxidative stress is associated with the number of components of metabolic syndrome: LIPGENE study. *Exp Mol Med*. 2013;45:e28.
94. Lapointe A, Couillard C, Lemieux S. Effects of dietary factors on oxidation of low-density lipoprotein particles. *J Nutr Biochem*. 2006;17:645–658.
95. Sola R, La Ville AE, Richard JL, et al. Oleic acid rich diet protects against the oxidative modification of high density lipoprotein. *Free Radic Biol Med*. 1997;22:1037–1045.
96. Covas MI. Olive oil and the cardiovascular system. *Pharmacol Res*. 2007;55:175–186.
97. van Dijk SJ, Feskens EJ, Bos MB, et al. A saturated fatty acid-rich diet induces an obesity-linked proinflammatory gene expression profile in adipose tissue of subjects at risk of metabolic syndrome. *Am J Clin Nutr*. 2009;90:1656–1664.
98. Jimenez-Gomez Y, Lopez-Miranda J, Blanco-Colio LM, et al. Olive oil and walnut breakfasts reduce the postprandial inflammatory response in mononuclear cells compared with a butter breakfast in healthy men. *Atherosclerosis*. 2009;204:e70–76.
99. Cabello-Moruno R, Perona JS, Ruiz-Gutierrez V. Influence of minor components of olive oils on the composition and size of TRLs and on macrophage receptors involved in foam cell formation. *Biochem Soc Trans*. 2007;35(pt 3):470–471.
100. Hernaez A, Fernandez-Castillejo S, Farras M, et al. Olive oil polyphenols enhance high-density lipoprotein function in humans: a randomized controlled trial. *Arterioscler Thromb Vasc Biol*. 2014;34:2115–2119.
101. Covas MI, de la Torre K, Farre-Albaladejo M, et al. Postprandial LDL phenolic content and LDL oxidation are modulated by olive oil phenolic compounds in humans. *Free Radic Biol Med*. 2006;40:608–616.
102. Konstantinidou V, Covas MI, Sola R, et al. Up-to date knowledge on the in vivo transcriptomic effect of the Mediterranean diet in humans. *Mol Nutr Food Res*. 2013;57:772–783.

103. Farras M, Valls RM, Fernandez-Castillejo S, et al. Olive oil polyphenols enhance the expression of cholesterol efflux related genes in vivo in humans. A randomized controlled trial. *J Nutr Biochem*. 2013;24:1334–1339.
104. US Food and Drug Administration. Press Release P04-100. November 1, 2004. <http://www.fda.gov/bbs/topics/news/2004/NEW01129.html>. Accessed October 26, 2016.
105. European Union Commission; 2001. Council Regulation (EC) No. 1513/2001 of 23 July 2001 amending regulation (EC) 136/66/EEC and No. 1638/98 as regards the extension of the period of validity of the aid scheme and the quality strategy for olive oil. *Off J Eur Comm*. 2005;L201:4–7.
106. Fito M, Guxens M, Corella D, et al. Effect of a traditional Mediterranean diet on lipoprotein oxidation: a randomized controlled trial. *Arch Intern Med*. 2007;167:1195–1203.
107. Castaner O, Covas MI, Khymenets O, et al. Protection of LDL from oxidation by olive oil polyphenols is associated with a downregulation of CD40-ligand expression and its downstream products in vivo in humans. *Am J Clin Nutr*. 2012;95:1238–1244.
108. US Department of Health and Human Services, US Department of Agriculture. 2015–2020 Dietary Guidelines for Americans. 8th ed. December 2015. <http://health.gov/dietaryguidelines/2015/guidelines/>. Accessed October 26, 2016.
109. Esmailzadeh A, Kimiagar M, Mehrabi Y, et al. Dietary patterns, insulin resistance, and prevalence of the metabolic syndrome in women. *Am J Clin Nutr*. 2007;85:910–918.
110. Hsiao PY, Mitchell DC, Coffman DL, et al. Dietary patterns and relationship to obesity-related health outcomes and mortality in adults 75 years of age or greater. *J Nutr Health Aging*. 2013;17:566–572.
111. Lutsey PL, Steffen LM, Stevens J. Dietary intake and the development of the metabolic syndrome: the Atherosclerosis Risk in Communities study. *Circulation*. 2008;117:754–761.
112. Azadbakht L, Mirmiran P, Esmailzadeh A, et al. Beneficial effects of a Dietary Approaches to Stop Hypertension eating plan on features of the metabolic syndrome. *Diabetes Care*. 2005;28:2823–2831.
113. Root MM, Dawson HR. DASH-like diets high in protein or monounsaturated fats improve metabolic syndrome and calculated vascular risk. *Int J Vitam Nutr Res*. 2013;83:224–231.
114. Saneei P, Fallahi E, Barak F, et al. Adherence to the DASH diet and prevalence of the metabolic syndrome among Iranian women. *Eur J Nutr*. 2015;54:421–428.
115. Saneei P, Hashemipour M, Kelishadi R, et al. Effects of recommendations to follow the Dietary Approaches to Stop Hypertension (DASH) diet v. usual dietary advice on childhood metabolic syndrome: a randomised cross-over clinical trial. *Br J Nutr*. 2013;110:2250–2259.
116. Uusitupa M, Hermansen K, Savolainen MJ, et al. Effects of an isocaloric healthy Nordic diet on insulin sensitivity, lipid profile and inflammation markers in metabolic syndrome—a randomized study (SYSDIET). *J Intern Med*. 2013;274:52–66.
117. Rizzo NS, Sabate J, Jaceldo-Siegl K, et al. Vegetarian dietary patterns are associated with a lower risk of metabolic syndrome: the Adventist Health Study 2. *Diabetes Care*. 2011;34:1225–1227.
118. Turner-McGrievy G, Harris M. Key elements of plant-based diets associated with reduced risk of metabolic syndrome. *Curr Diab Rep*. 2014;14:524.
119. Calton EK, James AP, Pannu PK, et al. Certain dietary patterns are beneficial for the metabolic syndrome: reviewing the evidence. *Nutr Res*. 2014;34:559–568.
120. Sievenpiper JL, Kendall CW, Esfahani A, et al. Effect of non-oil-seed pulses on glycaemic control: a systematic review and meta-analysis of randomised controlled experimental trials in people with and without diabetes. *Diabetologia*. 2009;52:1479–1495.
121. Sajjadi F, Gharipour M, Mohammadifard N, et al. Relationship between legumes consumption and metabolic syndrome: findings of the Isfahan Healthy Heart Program. *ARYA Atheroscler*. 2014;10:18–24.
122. Mattei J, Hu FB, Campos H. A higher ratio of beans to white rice is associated with lower cardiometabolic risk factors in Costa Rican adults. *Am J Clin Nutr*. 2011;94:869–876.
123. Papanikolaou Y, Fulgoni VL 3rd. Bean consumption is associated with greater nutrient intake, reduced systolic blood pressure, lower body weight, and a smaller waist circumference in adults: results from the National Health and Nutrition Examination Survey 1999–2002. *J Am Coll Nutr*. 2008;27:569–576.
124. Hosseinpour-Niazi S, Mirmiran P, Mirzaei S, et al. Cereal, fruit and vegetable fibre intake and the risk of the metabolic syndrome: a prospective study in the Tehran Lipid and Glucose Study. *J Hum Nutr Diet*. 2015;28:236–245.
125. Venn BJ, Mann JI. Cereal grains, legumes and diabetes. *Eur J Clin Nutr*. 2004;58:1443–1461.
126. Murtaugh MA, Jacobs DR Jr, Jacob B, et al. Epidemiological support for the protection of whole grains against diabetes. *Proc Nutr Soc*. 2003;62:143–149.
127. Villegas R, Gao YT, Yang G, et al. Legume and soy food intake and the incidence of type 2 diabetes in the Shanghai Women's Health Study. *Am J Clin Nutr*. 2008;87:162–167.
128. Bazzano LA, Thompson AM, Tees MT, et al. Non-soy legume consumption lowers cholesterol levels: a meta-analysis of randomized controlled trials. *Nutr Metab Cardiovasc Dis*. 2011;21:94–103.
129. Anderson JW, Major AW. Pulses and lipaemia, short- and long-term effect: potential in the prevention of cardiovascular disease. *Br J Nutr*. 2002;88(suppl 3):S263–S271.
130. Jayalath VH, de Souza RJ, Sievenpiper JL, et al. Effect of dietary pulses on blood pressure: a systematic review and meta-analysis of controlled feeding trials. *Am J Hypertens*. 2014;27:56–64.
131. Sala-Vila A, Estruch R, Ros E. New insights into the role of nutrition in CVD prevention. *Curr Cardiol Rep*. 2015;17:26.
132. Streppel MT, Arends LR, van 't Veer P, et al. Dietary fiber and blood pressure: a meta-analysis of randomized placebo-controlled trials. *Arch Intern Med*. 2005;165:150–156.
133. Hosseinpour-Niazi S, Mirmiran P, Sohrab G, et al. Inverse association between fruit, legume, and cereal fiber and the risk of metabolic syndrome: Tehran Lipid and Glucose Study. *Diabetes Res Clin Pract*. 2011;94:276–283.
134. Williams PG. The benefits of breakfast cereal consumption: a systematic review of the evidence base. *Adv Nutr*. 2014;5:636S–673S.
135. Kochar J, Gaziano JM, Djousse L. Breakfast cereals and risk of hypertension in the Physicians' Health Study I. *Clin Nutr*. 2012;31:89–92.
136. Cooper AJ, Forouhi NG, Ye Z, et al. Fruit and vegetable intake and type 2 diabetes: EPIC-InterAct prospective study and meta-analysis. *Eur J Clin Nutr*. 2012;66:1082–1092.
137. Carter P, Gray LJ, Troughton J, et al. Fruit and vegetable intake and incidence of type 2 diabetes mellitus: systematic review and meta-analysis. *BMJ*. 2010;341:c4229.
138. Shin JY, Kim JY, Kang HT, et al. Effect of fruits and vegetables on metabolic syndrome: a systematic review and meta-analysis of randomized controlled trials. *Int J Food Sci Nutr*. 2015;66:416–425.
139. Wallace IR, McEvoy CT, Hunter SJ, et al. Dose-response effect of fruit and vegetables on insulin resistance in people at high risk of cardiovascular disease: a randomized controlled trial. *Diabetes Care*. 2013;36:3888–3896.
140. McCall DO, McGartland CP, McKinley MC, et al. The effect of increased dietary fruit and vegetable consumption on endothelial activation, inflammation and oxidative stress in hypertensive volunteers. *Nutr Metab Cardiovasc Dis*. 2011;21:658–664.
141. Mozaffarian D, Wu JH. Omega-3 fatty acids and cardiovascular disease: effects on risk factors, molecular pathways, and clinical events. *J Am Coll Cardiol*. 2011;58:2047–2067.
142. Rizos EC, Ntzani EE, Bika E, et al. Association between omega-3 fatty acid supplementation and risk of major cardiovascular disease events: a systematic review and meta-analysis. *JAMA*. 2012;308:1024–1033.
143. Abete I, Goyenechea E, Zulet MA, et al. Obesity and metabolic syndrome: potential benefit from specific nutritional components. *Nutr Metab Cardiovasc Dis*. 2011;21(suppl 2):B1–B15.
144. Panagiotakos DB, Pitsavos C, Skoumas Y, et al. The association between food patterns and the metabolic syndrome using principal components analysis: the ATTICA Study. *J Am Diet Assoc*. 2007;107:979–987; quiz 997.
145. Kim J, Jo I. Grains, vegetables, and fish dietary pattern is inversely associated with the risk of metabolic syndrome in South Korean adults. *J Am Diet Assoc*. 2011;111:1141–1149.
146. Williams DE, Prevost AT, Whichelow MJ, et al. A cross-sectional study of dietary patterns with glucose intolerance and other features of the metabolic syndrome. *Br J Nutr*. 2000;83:257–266.
147. Puglisi MJ, Hasty AH, Saraswathi V. The role of adipose tissue in mediating the beneficial effects of dietary fish oil. *J Nutr Biochem*. 2011;22:101–108.
148. Ruidavets JB, Bongard V, Dallongeville J, et al. High consumptions of grain, fish, dairy products and combinations of these are associated with a low prevalence of metabolic syndrome. *J Epidemiol Community Health*. 2007;61:810–817.
149. Baik I, Abbott RD, Curb JD, et al. Intake of fish and n-3 fatty acids and future risk of metabolic syndrome. *J Am Diet Assoc*. 2010;110:1018–1026.
150. Noel SE, Newby PK, Ordovas JM, et al. Adherence to an (n-3) fatty acid/fish intake pattern is inversely associated with metabolic syndrome among Puerto Rican adults in the Greater Boston area. *J Nutr*. 2010;140:1846–1854.
151. Erkkila AT, Schwab US, de Mello VD, et al. Effects of fatty and lean fish intake on blood pressure in subjects with coronary heart disease using multiple medications. *Eur J Nutr*. 2008;47:319–328.
152. Vazquez C, Botella-Carretero JI, Corella D, et al. White fish reduces cardiovascular risk factors in patients with metabolic syndrome: the WISH-CARE study, a multi-center randomized clinical trial. *Nutr Metab Cardiovasc Dis*. 2014;24:328–335.
153. Lankinen M, Schwab U, Erkkila A, et al. Fatty fish intake decreases lipids related to inflammation and insulin signaling—a lipidomics approach. *PLoS One*. 2009;4:e5258.
154. Lankinen M, Schwab U, Kolehmainen M, et al. Whole grain products, fish and bilberries alter glucose and lipid metabolism in a randomized, controlled trial: the Sysdiet study. *PLoS One*. 2011;6:e22646.
155. Slivkoff-Clark KM, James AP, Mamo JC. The chronic effects of fish oil with exercise on postprandial lipaemia and chylomicron homeostasis in insulin resistant viscero-obese men. *Nutr Metab (Lond)*. 2012;9:9.

156. Balfegio M, Canivell S, Hanzu FA, et al. Effects of sardine-enriched diet on metabolic control, inflammation and gut microbiota in drug-naïve patients with type 2 diabetes: a pilot randomized trial. *Lipids Health Dis.* 2016;15:78.
157. Lankinen M, Kolehmainen M, Jaaskelainen T, et al. Effects of whole grain, fish and bilberries on serum metabolic profile and lipid transfer protein activities: a randomized trial (Sysdimeet). *PLoS One.* 2014;9:e90352.
158. Soares de Oliveira Carvalho AP, Kimi Uehara S, Nogueira Netto JF, et al. Hypocaloric diet associated with the consumption of jam enriched with microencapsulated fish oil decreases insulin resistance. *Nutr Hosp.* 2014;29:1103–1108.
159. Lee TC, Ivester P, Hester AG, et al. The impact of polyunsaturated fatty acid-based dietary supplements on disease biomarkers in a metabolic syndrome/diabetes population. *Lipids Health Dis.* 2014;13:196.
160. Simao AN, Lozovoy MA, Bahls LD, et al. Blood pressure decrease with ingestion of a soya product (kinako) or fish oil in women with the metabolic syndrome: role of adiponectin and nitric oxide. *Br J Nutr.* 2012;108:1435–1442.
161. Dewell A, Marvasti FF, Harris WS, et al. Low- and high-dose plant and marine (n-3) fatty acids do not affect plasma inflammatory markers in adults with metabolic syndrome. *J Nutr.* 2011;141:2166–2171.
162. Root M, Collier SR, Zwetsloot KA, et al. A randomized trial of fish oil omega-3 fatty acids on arterial health, inflammation, and metabolic syndrome in a young healthy population. *Nutr J.* 2013;12:40.
163. Lai YH, Petrone AB, Pankow JS, et al. Association of dietary omega-3 fatty acids with prevalence of metabolic syndrome: the National Heart, Lung, and Blood Institute Family Heart Study. *Clin Nutr.* 2013;32:966–969.
164. Poudyal H, Panchal SK, Diwan V, et al. Omega-3 fatty acids and metabolic syndrome: effects and emerging mechanisms of action. *Prog Lipid Res.* 2011;50:372–387.
165. Salas-Salvado J, Martinez-Gonzalez MA, Bullo M, et al. The role of diet in the prevention of type 2 diabetes. *Nutr Metab Cardiovasc Dis.* 2011;21(suppl 2):B32–B48.
166. Ros E, Hu FB. Consumption of plant seeds and cardiovascular health: epidemiological and clinical trial evidence. *Circulation.* 2013;128:553–565.
167. Afshin A, Micha R, Khatibzadeh S, et al. Consumption of nuts and legumes and risk of incident ischemic heart disease, stroke, and diabetes: a systematic review and meta-analysis. *Am J Clin Nutr.* 2014;100:278–288.
168. Zhou D, Yu H, He F, et al. Nut consumption in relation to cardiovascular disease risk and type 2 diabetes: a systematic review and meta-analysis of prospective studies. *Am J Clin Nutr.* 2014;100:270–277.
169. Sabate J, Oda K, Ros E. Nut consumption and blood lipid levels: a pooled analysis of 25 intervention trials. *Arch Intern Med.* 2010;170:821–827.
170. Flores-Mateo G, Rojas-Rueda D, Basora J, et al. Nut intake and adiposity: meta-analysis of clinical trials. *Am J Clin Nutr.* 2013;97:1346–1355.
171. Blanco Mejia S, Kendall CW, Viguiouk E, et al. Effect of tree nuts on metabolic syndrome criteria: a systematic review and meta-analysis of randomised controlled trials. *BMJ Open.* 2014;4:e004660.
172. Ibarrola-Jurado N, Bullo M, Guasch-Ferre M, et al. Cross-sectional assessment of nut consumption and obesity, metabolic syndrome and other cardiometabolic risk factors: the PREDIMED study. *PLoS One.* 2013;8:e57367.
173. Fernandez-Montero A, Bes-Rastrollo M, Beunza JJ, et al. Nut consumption and incidence of metabolic syndrome after 6-year follow-up: the SUN (Seguimiento Universidad de Navarra, University of Navarra Follow-up) cohort. *Public Health Nutr.* 2013;16:2064–2072.
174. O'Neil CE, Keast DR, Nicklas TA, et al. Nut consumption is associated with decreased health risk factors for cardiovascular disease and metabolic syndrome in U.S. adults: NHANES 1999–2004. *J Am Coll Nutr.* 2011;30:502–510.
175. Crichton GE, Bryan J, Buckley J, et al. Dairy consumption and metabolic syndrome: a systematic review of findings and methodological issues. *Obes Rev.* 2011;12:e190–201.
176. Shin H, Yoon YS, Lee Y, et al. Dairy product intake is inversely associated with metabolic syndrome in Korean adults: Anseong and Ansan cohort of the Korean Genome and Epidemiology Study. *J Korean Med Sci.* 2013;28:1482–1488.
177. Fumeron F, Lamri A, Abi Khalil C, et al. Dairy consumption and the incidence of hyperglycemia and the metabolic syndrome: results from a French prospective study, Data from the Epidemiological Study on the Insulin Resistance Syndrome (DESIR). *Diabetes Care.* 2011;34:813–817.
178. Drehmer M, Pereira MA, Schmidt MI, et al. Total and full-fat, but not low-fat, dairy product intakes are inversely associated with metabolic syndrome in adults. *J Nutr.* 2016;146:81–89.
179. Babio N, Becerra-Tomas N, Martinez-Gonzalez MA, et al. Consumption of yogurt, low-fat milk, and other low-fat dairy products is associated with lower risk of metabolic syndrome incidence in an elderly Mediterranean population. *J Nutr.* 2015;145:2308–2316.
180. Louie JC, Flood VM, Rangan AM, et al. Higher regular fat dairy consumption is associated with lower incidence of metabolic syndrome but not type 2 diabetes. *Nutr Metab Cardiovasc Dis.* 2013;23:816–821.
181. Pereira MA, Jacobs DR Jr, Van Horn L, et al. Dairy consumption, obesity, and the insulin resistance syndrome in young adults: the CARDIA Study. *JAMA.* 2002;287:2081–2089.
182. Kim Y, Je Y. Dairy consumption and risk of metabolic syndrome: a meta-analysis. *Diabet Med.* 2016;33:428–440.
183. Tong X, Dong JY, Wu ZW, et al. Dairy consumption and risk of type 2 diabetes mellitus: a meta-analysis of cohort studies. *Eur J Clin Nutr.* 2011;65:1027–1031.
184. Aune D, Norat T, Romundstad P, et al. Dairy products and the risk of type 2 diabetes: a systematic review and dose-response meta-analysis of cohort studies. *Am J Clin Nutr.* 2013;98:1066–1083.
185. Gao D, Ning N, Wang C, et al. Dairy products consumption and risk of type 2 diabetes: systematic review and dose-response meta-analysis. *PLoS One.* 2013;8:e73965.
186. Chen M, Sun Q, Giovannucci E, et al. Dairy consumption and risk of type 2 diabetes: 3 cohorts of US adults and an updated meta-analysis. *BMC Med.* 2014;12:215.
187. Elwood PC, Pickering JE, Givens DJ, et al. The consumption of milk and dairy foods and the incidence of vascular disease and diabetes: an overview of the evidence. *Lipids.* 2010;45:925–939.
188. Gijbels L, Ding EL, Malik VS, et al. Consumption of dairy foods and diabetes incidence: a dose-response meta-analysis of observational studies. *Am J Clin Nutr.* 2016;103:1111–1124.
189. O'Connor LM, Lentjes MA, Luben RN, et al. Dietary dairy product intake and incident type 2 diabetes: a prospective study using dietary data from a 7-day food diary. *Diabetologia.* 2014;57:909–917.
190. Diaz-Lopez A, Bullo M, Martinez-Gonzalez MA, et al. Dairy product consumption and risk of type 2 diabetes in an elderly Spanish Mediterranean population at high cardiovascular risk. *Eur J Nutr.* 2016;55:349–360.
191. Hirahatake KM, Slavin JL, Maki KC, et al. Associations between dairy foods, diabetes, and metabolic health: potential mechanisms and future directions. *Metabolism.* 2014;63:618–627.
192. Shin JY, Xun P, Nakamura Y, He K. Egg consumption in relation to risk of cardiovascular disease and diabetes: a systematic review and meta-analysis. *Am J Clin Nutr.* 2013;98:146–159.
193. Kurotani K, Nanri A, Goto A, et al. Cholesterol and egg intakes and the risk of type 2 diabetes: the Japan Public Health Center-based Prospective Study. *Br J Nutr.* 2014;112:1636–1643.
194. Virtanen JK, Mursu J, Tuomainen TP, et al. Egg consumption and risk of incident type 2 diabetes in men: the Kuopio Ischaemic Heart Disease Risk Factor Study. *Am J Clin Nutr.* 2015;101:1088–1096.
195. Louie JC, Flood VM, Hector DJ, et al. Dairy consumption and overweight and obesity: a systematic review of prospective cohort studies. *Obes Rev.* 2011;12:e582–592.
196. Martinez-Gonzalez MA, Sayon-Orea C, Ruiz-Canela M, et al. Yogurt consumption, weight change and risk of overweight/obesity: the SUN cohort study. *Nutr Metab Cardiovasc Dis.* 2014;24:1189–1196.
197. Mozaffarian D, Hao T, Rimm EB, et al. Changes in diet and lifestyle and long-term weight gain in women and men. *N Engl J Med.* 2011;364:2392–2404.
198. Abargouei AS, Janghorbani M, Salehi-Marzjafari M, et al. Effect of dairy consumption on weight and body composition in adults: a systematic review and meta-analysis of randomized controlled clinical trials. *Int J Obes (Lond).* 2012;36:1485–1493.
199. Chen M, Pan A, Malik VS, Hu FB. Effects of dairy intake on body weight and fat: a meta-analysis of randomized controlled trials. *Am J Clin Nutr.* 2012;96:735–747.
200. Ralston RA, Lee JH, Truby H, et al. A systematic review and meta-analysis of elevated blood pressure and consumption of dairy foods. *J Hum Hypertens.* 2012;26:3–13.
201. Pfeuffer M, Schrenzenmeier J. Milk and the metabolic syndrome. *Obes Rev.* 2007;8:109–118.
202. Jauhiainen T, Korpela R. Milk peptides and blood pressure. *J Nutr.* 2007;137(3 suppl 2):825S–829S.
203. van Meijl LE, Vrolix R, Mensink RP. Dairy product consumption and the metabolic syndrome. *Nutr Res Rev.* 2008;21:148–157.
204. Christensen R, Lorenzen JK, Svith CR, et al. Effect of calcium from dairy and dietary supplements on faecal fat excretion: a meta-analysis of randomized controlled trials. *Obes Rev.* 2009;10:475–486.
205. Zemel MB. Calcium modulation of hypertension and obesity: mechanisms and implications. *J Am Coll Nutr.* 2001;20(5 suppl):428S–435S; discussion 440S–442S.
206. Astrup A, Chaput JP, Gilbert JA, et al. Dairy beverages and energy balance. *Physiol Behav.* 2010;100:67–75.
207. Lorenzen J, Frederiksen R, Hoppe C, et al. The effect of milk proteins on appetite regulation and diet-induced thermogenesis. *Eur J Clin Nutr.* 2012;66:622–627.
208. Lawrence GD. Dietary fats and health: dietary recommendations in the context of scientific evidence. *Adv Nutr.* 2013;4:294–302.
209. World Health Organization. Guideline: Sugars Intake for Adult and Children. Geneva: World Health Organization; 2015.
210. Popkin BM, Nielsen SJ. The sweetening of the world's diet. *Obes Res.* 2003;11:1325–1332.
211. Laville M, Nazare JA. Diabetes, insulin resistance and sugars. *Obes Rev.* 2009;10(suppl 1):24–33.



212. Singh GM, Micha R, Khatibzadeh S, et al. Global, regional, and national consumption of sugar-sweetened beverages, fruit juices, and milk: a systematic assessment of beverage intake in 187 countries. *PloS One*. 2015;10:e0124845.
213. Pan A, Hu FB. Effects of carbohydrates on satiety: differences between liquid and solid food. *Curr Opin Clin Nutr Metabol Care*. 2011;14:385–390.
214. Zheng M, Allman-Farinelli M, Heitmann BL, et al. Substitution of sugar-sweetened beverages with other beverage alternatives: a review of long-term health outcomes. *J Acad Nutr Dietetics*. 2015;115:767–779.
215. Malik VS, Pan A, Willett WC, et al. Sugar-sweetened beverages and weight gain in children and adults: a systematic review and meta-analysis. *Am J Clin Nutr*. 2013;98:1084–1102.
216. Malik VS, Schulze MB, Hu FB. Intake of sugar-sweetened beverages and weight gain: a systematic review. *Am J Clin Nutr*. 2006;84:274–288.
217. Te Morenga L, Mallard S, Mann J. Dietary sugars and body weight: systematic review and meta-analyses of randomised controlled trials and cohort studies. *BMJ*. 2013;346:e7492.
218. Houchins JA, Burgess JR, Campbell WW, et al. Beverage vs. solid fruits and vegetables: effects on energy intake and body weight. *Obesity*. 2012;20:1844–1850.
219. Imamura F, O'Connor L, Ye Z, et al. Consumption of sugar sweetened beverages, artificially sweetened beverages, and fruit juice and incidence of type 2 diabetes: systematic review, meta-analysis, and estimation of population attributable fraction. *BMJ*. 2015;351:h3576.
220. Malik VS, Popkin BM, Bray GA, et al. Sugar-sweetened beverages and risk of metabolic syndrome and type 2 diabetes: a meta-analysis. *Diabetes Care*. 2010;33:2477–2483.
221. Greenwood DC, Threapleton DE, Evans CE, et al. Association between sugar-sweetened and artificially sweetened soft drinks and type 2 diabetes: systematic review and dose-response meta-analysis of prospective studies. *Br J Nutr*. 2014;112:725–734.
222. Te Morenga LA, Watkinson AJ, Jones RM, et al. Dietary sugars and cardiometabolic risk: systematic review and meta-analyses of randomized controlled trials of the effects on blood pressure and lipids. *Am J Clin Nutr*. 2014;100:65–79.
223. Cheungpasitporn W, Thongprayoon C, Edmonds PJ, et al. Sugar and artificially sweetened soda consumption linked to hypertension: a systematic review and meta-analysis. *Clin Exp Hypertens*. 2015;29:587–593.
224. Jayalath VH, de Souza RJ, Ha V, et al. Sugar-sweetened beverage consumption and incident hypertension: a systematic review and meta-analysis of prospective cohorts. *Am J Clin Nutr*. 2015;102:914–921.
225. Stanhope KL, Havel PJ. Fructose consumption: potential mechanisms for its effects to increase visceral adiposity and induce dyslipidemia and insulin resistance. *Curr Opin Lipidol*. 2008;19:16–24.
226. Rutledge AC, Adeli K. Fructose and the metabolic syndrome: pathophysiology and molecular mechanisms. *Nutr Rev*. 2007;65(6 pt 2):S13–S23.
227. Wiebe N, Padwal R, Field C, et al. A systematic review on the effect of sweeteners on glycemic response and clinically relevant outcomes. *BMC Med*. 2011;9:123.
228. Sievenpiper JL, de Souza RJ, Mirrahimi A, et al. Effect of fructose on body weight in controlled feeding trials: a systematic review and meta-analysis. *Annl Int Med*. 2012;156:291–304.
229. Chiavaroli L, de Souza RJ, Ha V, et al. Effect of fructose on established lipid targets: a systematic review and meta-analysis of controlled feeding trials. *J Am Heart Assoc*. 2015;4:e001700.
230. Cozma AI, Sievenpiper JL, de Souza RJ, et al. Effect of fructose on glycemic control in diabetes: a systematic review and meta-analysis of controlled feeding trials. *Diabetes Care*. 2012;35:1611–1620.
231. Jayalath VH, Sievenpiper JL, de Souza RJ, et al. Total fructose intake and risk of hypertension: a systematic review and meta-analysis of prospective cohorts. *J Am Coll Nutr*. 2014;33:328–339.
232. Pereira MA, Odegaard AO. Artificially sweetened beverages—do they influence cardiometabolic risk? *Curr Atherosclerosis Reports*. 2013;15:375.
233. Tucker LA, Tucker JM, Bailey BW, et al. A 4-year prospective study of soft drink consumption and weight gain: the role of calorie intake and physical activity. *Am J Health Promotion*. 2015;29:262–265.
234. de Koning L, Malik VS, Rimm EB, et al. Sugar-sweetened and artificially sweetened beverage consumption and risk of type 2 diabetes in men. *Am J Clin Nutr*. 2011;93:1321–1327.
235. Nettleton JA, Lutsey PL, Wang Y, et al. Diet soda intake and risk of incident metabolic syndrome and type 2 diabetes in the Multi-Ethnic Study of Atherosclerosis (MESA). *Diabetes Care*. 2009;32:688–694.
236. Phelan S, Lang W, Jordan D, et al. Use of artificial sweeteners and fat-modified foods in weight loss maintainers and always-normal weight individuals. *Int J Obes*. 2009;33:1183–1190.
237. Pereira MA. Sugar-sweetened and artificially-sweetened beverages in relation to obesity risk. *Adv Nutr*. 2014;5:797–808.
238. de Ruyter JC, Olthof MR, Seidell JC, et al. A trial of sugar-free or sugar-sweetened beverages and body weight in children. *N Engl J Med*. 2012;367:1397–1406.
239. Ebbeling CB, Feldman HA, Chomitz VR, et al. A randomized trial of sugar-sweetened beverages and adolescent body weight. *New Engl J Med*. 2012;367:1407–1416.
240. Hu FB. Resolved: there is sufficient scientific evidence that decreasing sugar-sweetened beverage consumption will reduce the prevalence of obesity and obesity-related diseases. *Obes Rev*. 2013;14:606–619.
241. Kardinaal AF, van Erk MJ, Dutman AE, et al. Quantifying phenotypic flexibility as the response to a high-fat challenge test in different states of metabolic health. *FASEB J*. 2015;29:4600–4613.
242. van Ommen B, van der Greef J, Ordoñez JM, et al. Phenotypic flexibility as key factor in the human nutrition and health relationship. *Genes Nutr*. 2014;9:423.
243. Norat T, Bowman R, Luben R, et al. Blood pressure and interactions between the angiotensin polymorphism AGT M235T and sodium intake: a cross-sectional population study. *Am J Clin Nutr*. 2008;88:392–397.
244. Oh SW, Han KH, Han SY, et al. Association of sodium excretion with metabolic syndrome, insulin resistance, and body fat. *Medicine (Baltimore)*. 2015;94:e1650.
245. Oh YS, Appel LJ, Galis ZS, et al. National Heart, Lung, and Blood Institute Working Group report on salt in human health and sickness: building on the current scientific evidence. *Hypertension*. 2016;68:281–288.
246. Chen J, Gu D, Huang J, et al. Metabolic syndrome and salt sensitivity of blood pressure in non-diabetic people in China: a dietary intervention study. *Lancet*. 2009;373:829–835.
247. Eljovich F, Weinberger MH, Anderson CA, et al. Salt sensitivity of blood pressure: a scientific statement from the American Heart Association. *Hypertension*. 2016;68:e7–e46.
248. Malaguamera M, Gargante MP, Russo C, et al. L-carnitine supplementation to diet: a new tool in treatment of nonalcoholic steatohepatitis—a randomized and controlled clinical trial. *Am J Gastroenterol*. 2010;105:1338–1345.
249. Musso G, Gambino R, Cassader M, et al. A meta-analysis of randomized trials for the treatment of nonalcoholic fatty liver disease. *Hepatology*. 2010;52:79–104.
250. Guerrero AL, Colvin RM, Schwartz AK, et al. Choline intake in a large cohort of patients with nonalcoholic fatty liver disease. *Am J Clin Nutr*. 2012;95:892–900.
251. Yu D, Shu XO, Xiang YB, et al. Higher dietary choline intake is associated with lower risk of nonalcoholic fatty liver in normal-weight Chinese women. *J Nutr*. 2014;144:2034–2040.
252. Erren TC, Reiter RJ. Defining chronodisruption. *J Pineal Res*. 2009;46:245–247.
253. Garaulet M, Madrid JA. Chronobiological aspects of nutrition, metabolic syndrome and obesity. *Adv Drug Deliv Rev*. 2010;62(9–10):967–978.
254. Sack RL, Auckley D, Auger RR, et al. Circadian rhythm sleep disorders: part I, basic principles, shift work and jet lag disorders. *An American Academy of Sleep Medicine review*. *Sleep*. 2007;30:1460–1483.
255. Gomez-Abellan P, Hernandez-Morante JJ, Lujan JA, et al. Clock genes are implicated in the human metabolic syndrome. *Int J Obes (Lond)*. 2008;32:121–128.
256. Gomez-Santos C, Gomez-Abellan P, Madrid JA, et al. Circadian rhythm of clock genes in human adipose explants. *Obesity (Silver Spring)*. 2009;17:1481–1485.
257. Garaulet M, Madrid JA. Chronobiology, genetics and metabolic syndrome. *Curr Opin Lipidol*. 2009;20:127–134.
258. Dallmann R, Viola AU, Tarokh L, et al. The human circadian metabolome. *Proc Natl Acad Sci U S A*. 2012;109:2625–2629.
259. Garaulet M, Gomez-Abellan P. Timing of food intake and obesity: a novel association. *Physiol Behav*. 2014;134:44–50.
260. Bandin C, Scheer FA, Luque AJ, et al. Meal timing affects glucose tolerance, substrate oxidation and circadian-related variables: A randomized, crossover trial. *Int J Obes (Lond)*. 2015;39:828–833.
261. Broussard JL, Ehrmann DA, Van Cauter E, et al. Impaired insulin signaling in human adipocytes after experimental sleep restriction: a randomized, crossover study. *Ann Intern Med*. 2012;157:549–557.
262. Rubio-Sastre P, Gomez-Abellan P, Martinez-Nicolas A, et al. Evening physical activity alters wrist temperature circadian rhythmicity. *Chronobiol Int*. 2014;31:276–282.
263. Wolff G, Esser KA. Scheduled exercise phase shifts the circadian clock in skeletal muscle. *Med Sci Sports Exerc*. 2012;44:1663–1670.
264. Hu FB. Dietary pattern analysis: a new direction in nutritional epidemiology. *Curr Opin Lipidol*. 2002;13:3–9.
265. Jacobs DR Jr, Gross MD, Tapsell LC. Food synergy: an operational concept for understanding nutrition. *Am J Clin Nutr*. 2009;89:1543S–1548S.
266. Perez-Martinez P, Phillips CM, Delgado-Lista J, et al. Nutrigenetics, metabolic syndrome risk and personalized nutrition. *Curr Vasc Pharmacol*. 2013;11:946–953.
